# Supplementary material
Source: Springer Nature journal article supplement (https://www.springermedizin.de/resource/supplementary/12888_2013_1388_MOESM1_ESM.pdf/9480098)
Supplement: MOESM1 [file 9480098]

# Diabetesschulung im Rahmen der Diabetes-Depressions-Studie

## Liebe Diabetesberaterin, lieber Diabetesberater,

Sie haben sich entschlossen die Diabetesschulung der Diabetes-Depressions-Studie (DAD-Studie) durchzuführen. Deshalb möchten wir Ihnen **wichtige Informationen** zum Hintergrund, Zielsetzung und Ablauf der DAD-Studie geben.

Die Diabetes-Depressions-Studie (DAD-Studie) ist eine multizentrische Studie. Die Studienzentrale ist in der Westfälischen Klinik Dortmund / Ruhr-Universität Bochum. Weitere beteiligte Studienzentren sind das Diabetes Zentrum in Bad Mergentheim, das Psychologische Institut der Johannes Gutenberg-Universität Mainz und die Klinik für Psychosomatische Medizin und Psychotherapie der Heinrich Heine-Universität in Düsseldorf. Die Studie wird gefördert vom Bundesministerium für Bildung und Forschung (BMBF). Die Projektlaufzeit ist voraussichtlich vom 01.02.2006 bis 01/2009.

**Hintergrund** der DAD-Studie ist, dass die Komorbidität von Diabetes und Depression mit einer deutlich schlechteren Prognose des Diabetes einhergeht. Interventionen für diese Patientengruppe sind bisher nicht ausreichend evaluiert.

**Zielsetzung der Studie** ist eine Verbesserung der Behandlungsmöglichkeiten depressiver Diabetiker. Hierzu soll die Wirksamkeit des bereits zugelassenen Antidepressivum „Sertralin“ mit einer Kognitiven Verhaltenstherapie verglichen werden. Hypothese ist, dass sich durch eine Verbesserung der Depression längerfristig auch die Stoffwechseleinstellung (gemessen am HbA1c) verbessert.

Die **Studienteilnehmer** sind Menschen, bei denen die Diagnose eines Diabetes mellitus vom Typ I oder Typ II seit mindestens 12 Monaten bekannt ist und die seit mindestens sechs Monaten mit Insulin behandelt werden. Sie sind im Alter zwischen 21 und 65 Jahren, leiden zusätzlich zu ihrem Diabetes an einer Depression und weisen eine schlechte Stoffwechseleinstellung auf (HbA1c zweimalig >8% in den letzten 9 Monaten).

Das **Studiendesign** sieht vor, die Depression der Probanden mit einer 12-wöchigen Kurzzeittherapie (entweder Kognitiven Verhaltenstherapie oder medikamentös mit dem Antidepressivum „Sertralin“) zu behandeln. Beide Gruppen erhalten während der Studienteilnahme ihre Diabetestherapie wie bisher.

**Diabetesschulung:** Alle Studienteilnehmer erhalten vor Beginn der Behandlungsphase eine kurze Diabetesschulung. Diese dient vor allem dem Auffrischen bisher geschulten diabetesbezogenen Wissens. Da die Studienteilnehmer in erster Linie in diabetologischen Schwerpunktpraxen rekrutiert werden und bei ihnen seit mehr als 12 Monaten die Diagnose Diabetes bekannt ist, gehen wir davon aus, dass diese bereits eine ausführliche Diabetesschulung erhalten haben.

Die Schulung findet an insgesamt 2 Tagen statt und ist auf die Dauer von jeweils 3 Stunden ausgerichtet. Die Studienteilnehmer, Typ I und Typ II Diabetiker, werden gemeinsam in der Gruppe von max. 8 Personen geschult. In der Diabetesschulung sollen die Themen wiederholt, vertieft und ggf. Fragen oder Probleme besprochen werden. Da es sich bei den Studienteilnehmern um Menschen mit einer bisher unbehandelten Depression handelt, deren Konzentrationsfähigkeit meist beeinträchtigt ist, sollten die Kursstunden nicht länger als 45 Minuten dauern und zwischen den einzelnen Kursstunden jeweils eine 10 – 15 min. Pause liegen.

Da es sich um eine Diabetesschulung im Rahmen einer multizentrischen Studie handelt, ist es unbedingt notwendig, diese standardisiert durchzuführen (d.h. in allen vier Studienzentren mit den gleichen Inhalten, Umfang, Materialien und Vorgehen). Da Typ I und Typ II Diabetiker gemeinsam geschult werden, wurden die Arbeitsmaterialien aus dem Schulungsprogramm „Medias 2“ (Für Typ II) und dem Schulungsprogramm von „Lilly“ (für Typ I) kombiniert.

**Vielen Dank für Ihre Mitarbeit!**

**Tag 1:****Inhalte der Kursstunden****1. Kursstunde:****Einführung:**

- Begrüßung
- Inhaltliche und organisatorische Rahmenbedingungen
- Vorstellungsrunde

**Diabetesgrundlagen:**

- Erklärungsmodell für Entstehung des Typ I und Typ II Diabetes
- Insulinwirkung

**Selbstkontrolle:**

- Blutzuckermessung
- Blutdruckkontrolle

**2. Kursstunde:****Ernährung**

- Gesunde Ernährung
- Kohlehydrate / BE
- Glykämischer Index

**3. Kursstunde:****Grundlagen Insulintherapie**

- Insulinwirkung
- Dosisanpassung
- Spritztechnik

**Tag 2:****4. Kursstunde:****Akutreaktionen: Unterzuckerung**

- Erkennen und Wahrnehmen
- Persönliche Problematik

**5. Kursstunde:****Körperliche Aktivität**

- Motivation zu körperlicher Aktivität
- Dosisanpassung an körperliche Aktivität

**6. Kursstunde:****Risikofaktoren für Folgeerkrankungen****Folgeerkrankungen**

- Rethinopathie
- Füße

**Kontrolle**

## Kurstunde 1: Überblick

|            | <b>Inhalt</b>                                      | <b>Seite</b> |
|------------|----------------------------------------------------|--------------|
| <b>1.1</b> | <b>Einführung</b>                                  | <b>5</b>     |
| 1.1.1      | Begrüßung der Teilnehmer                           | 5            |
| 1.1.2      | Inhaltliche und organisatorische Rahmenbedingungen | 6            |
| 1.1.3      | Vorstellungsrunde                                  | 6            |
| <b>1.2</b> | <b>Grundlagen des Diabetes</b>                     | <b>6</b>     |
| 1.2.1      | Erklärungsmodell Typ II                            | 8            |
| 1.2.2      | Erklärungsmodell Typ I                             | 9            |
| 1.2.3      | Insulinwirkung                                     | 9            |
| <b>1.3</b> | <b>Selbstkontrolle</b>                             | <b>10</b>    |
| 1.3.1      | Blutzuckerselbstkontrolle                          | 10           |
| 1.3.2      | Blutdruckmessung                                   | 13           |

## Kurstunde 1: Materialien

| Themen                          | Folien                                                 |
|---------------------------------|--------------------------------------------------------|
| <b>1.1 Einführung</b>           |                                                        |
| 1.1.1 Begrüßung                 | „Herzlich Willkommen“                                  |
| 1.1.2 Inhalte                   | „Übersicht Inhalte“                                    |
| 1.1.3 Vorstellungsrunde         | ---                                                    |
| <b>1.2 Grundlagen</b>           |                                                        |
|                                 | „Die Zellen brauchen Zucker“                           |
|                                 | „Insulin senkt den Blutzucker“                         |
| 1.2.1 Erklärungsmodell Typ II   | „Übergewicht stört die Insulinwirkung“                 |
|                                 | „Schlankwerden hilft“                                  |
| 1.2.2 Erklärungsmodell Typ I    | „Fehlende Insulinproduktion“                           |
|                                 | „Häufige Merkmale“                                     |
| 1.2.3 Insulinwirkung            | „Was Insulin bewirkt“                                  |
| <b>1.3 Selbstkontrolle</b>      |                                                        |
| 1.3.1 Blutzuckerselbstkontrolle | „Warum ist Blutzuckerselbstkontrolle wichtig?“         |
|                                 | „Praktische Blutzucker-Selbstkontrolle „Blutgewinnung“ |
|                                 | „Hinweis zur Teststreifenhandhabung“                   |
|                                 | „Blutzuckertagebuch“                                   |
| 1.3.2 Bluthochdruck             | „Bluthochdruck ein „leichtes oder ernsthaftes Problem“ |
|                                 | „Bluthochdruck: was versteht man darunter?“            |
|                                 | „Was sind günstige Blutdruckwerte?“                    |
|                                 | „Den Blutdruck selbst messen: Welche Geräte gibt es?“  |
|                                 | „Blutdruckmessung: die klassische Methode“             |

## Kurstunde 1: Durchführung

### 1.1 Einführung

#### 1.1.1 Begrüßung

##### Ziele

- Schaffen einer angenehmen Atmosphäre. Die Teilnehmer sollen sich wohl fühlen.

##### Vorgehen

Begrüßung der Teilnehmer und Vorstellen des Kursleiters.

##### Folie: Herzlich Willkommen

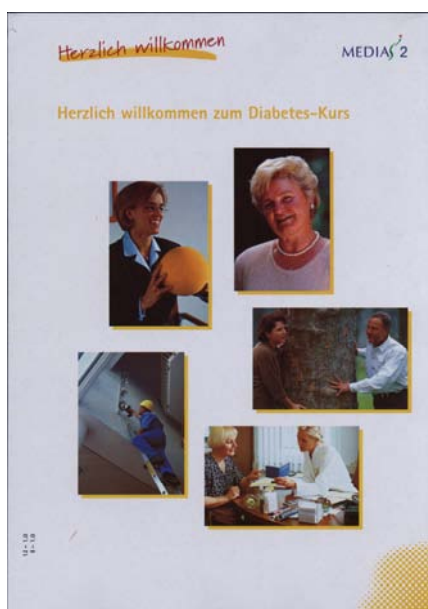

#### 1.1.2 Inhaltliche und organisatorische Rahmenbedingungen

##### Ziele:

- Die Kursteilnehmer sollen über die Inhalte des Kurses informiert werden.
- Die Teilnehmer sollen jeweils zu Beginn der Kursstunde über die Themen und den Ablauf orientiert sein.

##### Vorgehen:

Informieren Sie die Teilnehmer über die Inhalte des Kurses und geben Sie anschließend einen Überblick über die Themen der ersten Kursstunde.

##### Folie: Themen des Kurses

Weisen Sie darauf hin, dass es in dem Kurs um ein „Auffrischen“ der bisher geschulten Inhalte geht. Klären Sie anschließend mit den Teilnehmern Einzelheiten zur Organisation und zum Ablauf des Kurses (Termine, Zeitrahmen).

### **1.1.3 Vorstellungsrunde**

#### **Ziele**

- Die Teilnehmer sollen sich untereinander kennenlernen.

#### **Vorgehen**

Freie Vorstellungsrunde: Sie bitten die Teilnehmer, sich kurz vorzustellen.

(Die Vorstellungsrunde sollte nicht zu viel Zeit in Anspruch nehmen, max. 10 Minuten).

## **1.2 Grundlagen des Diabetes: Erklärungsmodell Typ I und Typ II- Diabetiker**

#### **Ziele**

- Die Teilnehmer sollen ein Verständnis über die Ursache des Diabetes mellitus gewinnen und sich das Zustandekommen erhöhter Blutzuckerwerte erklären können. Dazu stellen sich die Teilnehmer zunächst die Verstoffwechslung einer Mahlzeit bei einer Person ohne Diabetes vor, bevor sie im zweiten Schritt die diabetesbedingten Unterschiede in verständlichen Bildern erarbeiten.
- Die Teilnehmer sollen sich Stoffwechselfvorgänge im eigenen Körper plastisch vorstellen können.
- Die Teilnehmer sollen den Unterschied zwischen Diabetes Typ I und Typ II verstehen.
- Die Teilnehmer sollen die Insulinwirkung verstehen können (Schlüssel-Schloss-Prinzip)

#### **Vorgehen**

Anhand der Folien erklären Sie zunächst die Vorgänge bei der Nahrungsverwertung bei gesunden Personen, um anschließend die Unterschiede beim Diabetes mellitus zu erarbeiten.

Stellen Sie heraus, dass der Mensch seine ganze Energie, die er zum Leben braucht, in Form der Nahrung zu sich nehmen muss. Im Folgenden stellen Sie dar, wie der Körper aus der Nahrung Energie gewinnt, die er zum Leben benötigt.

Zeigen Sie in bildhafter Form den Unterschied zwischen Stoffwechselgesunden und Menschen mit Diabetes.

# Erklären Sie wie in einer gesunden Zelle die Zuckerverbrennung funktioniert:

## Folie: Die Zellen brauchen Zucker

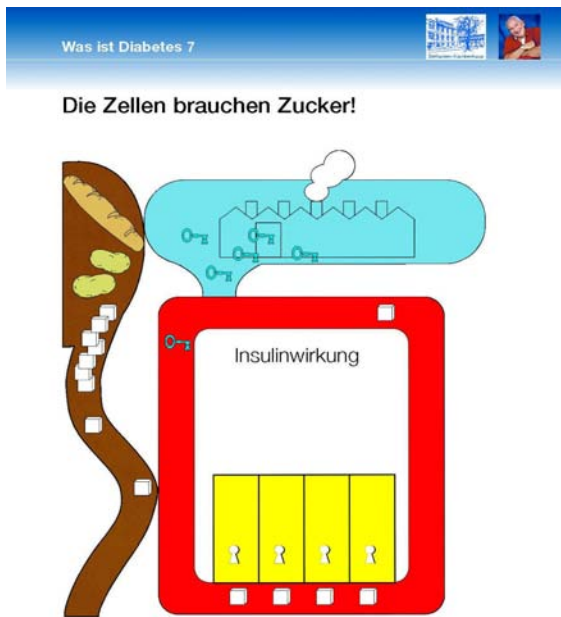

*Lilly*

# Erläutern Sie die Insulinwirkung in der Zelle:

## Folie: Insulin senkt den Blutzucker

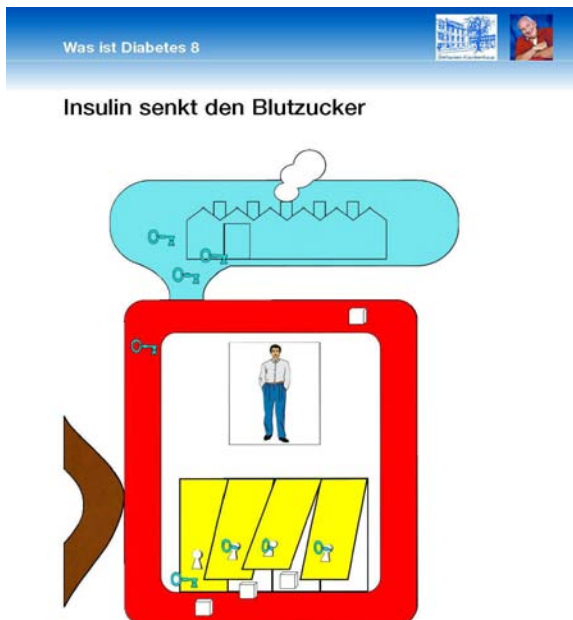

*Lilly*

## 1.2.1 Erklärungsmodell: Typ II Diabetes

Erläutern Sie die Faktoren, die bei der Entstehung des Diabetes mellitus Typ II eine Rolle spielen.

### Folie: Übergewicht stört die Insulinwirkung

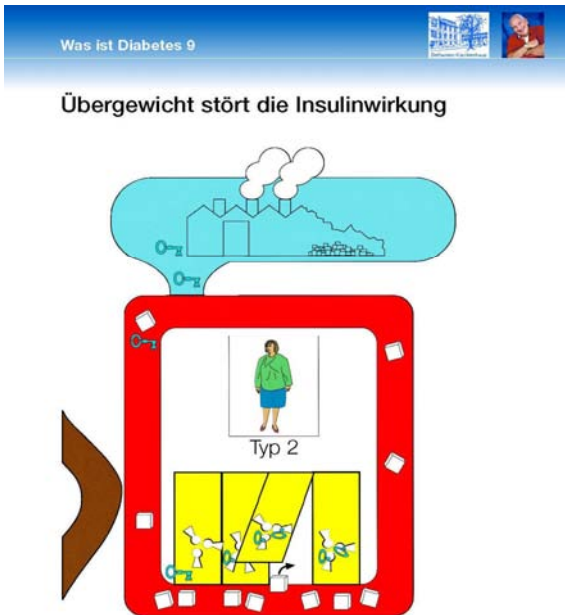

*Lilly*

Regen Sie im nächsten Schritt die Teilnehmer an, Möglichkeiten abzuleiten, die „Zelltüren gängiger zu machen“ um erhöhte Blutzuckerwerte zu vermeiden und das Risiko von Folgeerkrankungen zu minimieren.

### Folie: Schlankwerden hilft

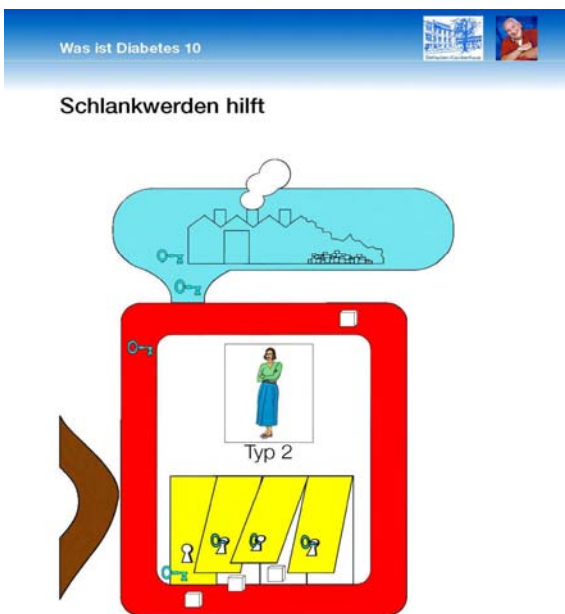

*Lilly*



## 1.2.2 Erklärungsmodell: Typ I Diabetiker

Erläutern Sie die Faktoren, die bei der Entstehung des Diabetes mellitus Typ I eine Rolle spielen.

### Folie: Fehlende Insulinproduktion

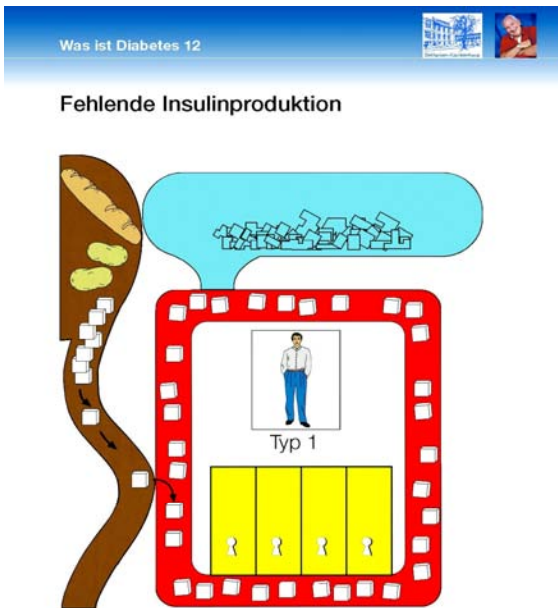

*Lilly*

## 1.2.3 Insulinwirkung:

Wiederholen Sie die Wirkung von Insulin an der Zelle.

### Folie: Was Insulin bewirkt

Was ist Diabetes 16

**Was Insulin bewirkt**

Insulin

- schleust den Zucker aus dem Blut in die Zellen.
- hemmt die Zuckerneubildung in der Leber.
- hemmt den Fettabbau.

Bei Insulinmangel

- gelangt der Zucker nicht aus dem Blut in die Zellen.
- produziert die Leber ungehemmt Zucker.
- wird vermehrt Fett abgebaut,  
→ als Abbauprodukt entsteht Azeton.

*Lilly*

## Merkmale des Diabetes mellitus: Unterschied zwischen Typ I und Typ II

Sammeln Sie mit den Patienten gemeinsam die häufigsten Merkmale des Diabetes mellitus und zeigen Sie so die Unterschiede auf zwischen Typ I und Typ II.

### Folie: Diabetes mellitus – Typ?

|                          | Typ 1                | Typ 2                                                                                     |
|--------------------------|----------------------|-------------------------------------------------------------------------------------------|
| <b>Beginn:</b>           | schnell              | langsam                                                                                   |
| <b>Anzeichen:</b>        | deutlich             | weniger oder gar nicht                                                                    |
| <b>Alter:</b>            | meist unter 40 Jahre | meist über 40 Jahre                                                                       |
| <b>Gewicht:</b>          | normal               | meist zu hoch                                                                             |
| <b>Therapie:</b>         | Insulin              | Bewegung und Ernährung<br>– evtl. Gewichtsabnahme<br>– evtl. Tabletten<br>– evtl. Insulin |
| <b>Vererbungsrisiko:</b> | gering (3–7%)        | groß (40%)                                                                                |

*Lilly*

## 1.3 Selbstkontrolle

### Ziele

Den Teilnehmern sollte deutlich werden, dass sie Risikofaktoren für diabetische Folgeerkrankungen selbst im Alltag überwachen können. Die regelmäßige Kontrolle von Blutzucker und Blutdruck kann zu Hause durchgeführt werden. Die Teilnehmer sollten motiviert werden, bei der Stoffwechselkontrolle im Alltag selbst aktiv zu werden.

Die Teilnehmer haben Gelegenheit die praktische Durchführung der Selbstkontrolle zu besprechen.

Die Teilnehmer lernen, dass regelmäßige Selbstkontrollen eine Möglichkeit darstellen, sich abzeichnende Stoffwechsellentgleisungen frühzeitig zu entdecken.

### 1.3.1 Blutzuckerselbstkontrolle

#### Ziele:

- Die Teilnehmer wissen, warum Selbstkontrolle wichtig ist.
- Die Teilnehmer wissen worauf sie bei der Handhabung der Teststreifen achten müssen.
- Die Teilnehmer beherrschen die Blutzucker-Selbstkontrolle.
- Die Teilnehmer wissen, wann die Blutzucker-Kontrolle sinnvoll ist.
- Die Teilnehmer können ihr Tagebuch korrekt führen und wissen welchen Nutzen ein Tagebuch haben kann.
- Die Teilnehmer können sich entscheiden wie viele Selbstkontrollen sie langfristig durchführen möchten.

## Vorgehen

Begründen Sie die Notwendigkeit und den Sinn, im Alltag Selbstkontrolle zu betreiben.

### Folie: Warum ist Blutzuckerselbstkontrolle wichtig?

Selbstkontrolle 3

Warum ist Blutzuckerselbstkontrolle wichtig?

- Sicherheit
  - im Alltag
  - in besonderen Situationen
    - Autofahren
    - Bewegung
    - Krankheit
    - Urlaub
- Überblick über die momentane Stoffwechsellage
- Insulindosisanpassung (Trends erkennen)
- gute Blutzuckereinstellung
- Zusammenarbeit mit Arzt oder Diabetesberater

*Lilly*

### Besprechen Sie die praktische Blutzuckerkontrolle:

Wiederholen Sie mit den Teilnehmern die Durchführung der Blutzuckerselbstkontrolle und erläutern Sie mögliche Fehler bei der Blutzuckermessung per Gerät.

### Folie: Praktische Blutzuckerkontrolle

Selbstkontrolle 5

Praktische Blutzuckerselbstkontrolle

Blutgewinnung:

- Hände waschen und gut abtrocknen
- kalte Finger massieren, kneten
- Fingerbeere seitlich anstechen
- alternative Stellen nur bei Nüchternblutzuckern
  - Daumenballen
  - Arme
  - Bauch
  - Oberschenkel
- Blut in **ausreichender** Menge entsprechend auf den Teststreifen aufsetzen oder an die Teststreifenkante halten (Sip-in-Technik)

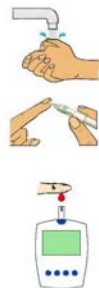

*Lilly*

## Besprechen Sie die korrekte Handhabung der Teststreifen:

### Folie: Hinweis zur Teststreifenhandhabung

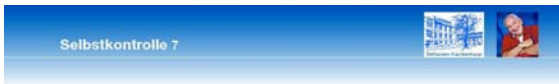

#### Praktische Blutzuckerselbstkontrolle

#### Hinweis zur Teststreifenhandhabung:

- Verwendbarkeitsdatum beachten
- keine Feuchtigkeit
- kein Frost
- kein direktes Sonnenlicht
- falls notwendig, auf richtige Codierung achten
- Teststreifen in Originalverpackung belassen (nicht mehrere Packungen zusammenschütten)

*Lilly*

## Besprechen Sie das Führen des Blutzuckertagebuchs:

### Folie: Blutzuckertagebuch

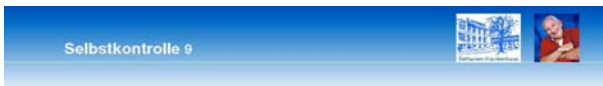

#### Blutzuckertagebuch Basis-Bolus-Therapie (intensivierte Insulintherapie)

| Datum:             | <input type="checkbox"/> Arbeitstag | <input type="checkbox"/> Urlaubstag | <input type="checkbox"/> Mo | <input type="checkbox"/> Di | <input type="checkbox"/> Mi | <input type="checkbox"/> Do | <input type="checkbox"/> Fr | <input type="checkbox"/> Sa | <input type="checkbox"/> So |
|--------------------|-------------------------------------|-------------------------------------|-----------------------------|-----------------------------|-----------------------------|-----------------------------|-----------------------------|-----------------------------|-----------------------------|
| Uhrzeit            |                                     |                                     |                             |                             |                             |                             |                             |                             | Gesamt                      |
| BZ                 |                                     |                                     |                             |                             |                             |                             |                             |                             |                             |
| HZ/Az.             |                                     |                                     |                             |                             |                             |                             |                             |                             |                             |
| BE                 |                                     |                                     |                             |                             |                             |                             |                             |                             |                             |
| BE-Faktor          |                                     |                                     |                             |                             |                             |                             |                             |                             |                             |
| Bolus              |                                     |                                     |                             |                             |                             |                             |                             |                             |                             |
| Basis              |                                     |                                     |                             |                             |                             |                             |                             |                             |                             |
| Blutdruck/<br>Puls |                                     |                                     |                             |                             |                             |                             |                             |                             | Korrektur-<br>Regel.        |

BZ    Blutzucker

HZ/Az.    Hamzucker/Azeton

BE    Proteinheit (Berechnungseinheit)

BE-Faktor    Rechengröße für Insulinmenge pro BE

Bolus    kurzwirkendes Insulin

Basis    Verzögerungsinsulin

*Lilly*

### 1.3.2 Blutdruck

Erhöhte Blutdruckwerte bereiten ähnlich wie chronisch erhöhte Blutzuckerwerte in der Regel wenig Beschwerden. Viele Menschen mit erhöhten Blutdruckwerten nehmen sie wegen ihrer relativen Beschwerdefreiheit nicht richtig ernst.

#### Ziele

- Die Teilnehmer sollen erkennen, dass das Erkennen und die Behandlung erhöhter Blutdruckwerte bei Menschen mit Diabetes genauso wichtig ist, wie die Therapie erhöhter Blutzuckerwerte.
- Die Teilnehmer sollen ein Verständnis über mögliche Ursachen und die Folgen eines unbehandelten Bluthochdrucks entwickeln.
- Die Teilnehmer sollen motiviert werden regelmäßig ihren Blutdruck zu kontrollieren und zu dokumentieren.
- Die Teilnehmer sollen lernen ihren Blutdruck selbst zu messen und die gemessenen Werte selbst beurteilen.

#### Vorgehen:

##### Blutdruckerleben:

Leiten Sie in das Thema ein und erfragen Sie, wie die Teilnehmer „über ihren Blutdruck denken“. Fragen Sie die Teilnehmer danach, inwieweit sie den Bluthochdruck bisher als persönliches Problem erlebt haben. Lassen Sie die Teilnehmer von ihren bisherigen Behandlungsbemühungen im Alltag berichten.

#### Folie: Blutdruck: ein „leichtes“ oder ernsthaftes Problem?

Blutdruck okay?! MEDIA 2

**Bluthochdruck:**  
ein „leichtes“ oder ernsthaftes Problem?

„Steigt der Blutdruck nicht auch mit dem Alter?“

„Was ist denn wichtiger: der Blutzucker oder der Blutdruck?“

„Haben Blutdruckmedikamente nicht auch Nebenwirkungen?“

„Ich fühle mich blendend – trotz hoher Blutdruckwerte.“

„Etwas höhere Blutdruckwerte sind mir ehrlich gesagt lieber, dann fühle ich mich besser.“

11 - 03  
1 - 22

## Plausibles Erklärungsmodell

Erläutern Sie zunächst in einfachen Worten den Begriff „Blutdruck“.

Erklären Sie die Bedeutung der beiden Werte, die bei der Messung des Blutdrucks angegeben werden.

Folie: Was versteht man darunter?

Blutdruck okay?! MEDIA 2

### Blutdruck: Was versteht man darunter?



Herz erzeugt Druck, damit das Blut fließt (Blut-Druck)

Herz pumpt Blut in Gefäße  
↓  
Blutdruck steigt, oberer Wert: **systolischer Blutdruck**

Herz entspannt sich, Herz füllt sich wieder  
↓  
Blutdruck sinkt, unterer Wert: **diastolischer Blutdruck**

12 - 10,6  
8 - 3,4

Informieren Sie die Teilnehmer darüber, welche Blutdruckwerte als „normal“ oder günstig einzuschätzen sind.

Folie: Was sind günstige Blutdruckwerte?

Blutdruck okay?! MEDIA 2

### Was sind günstige Blutdruckwerte?



● Blutdruckwerte unter **130/85**  
Dies bedeutet:  
oberer Wert: **unter 130 mm Hg**  
unterer Wert: **unter 85 mm Hg**

● besser: unter **120/80**  
oberer Wert: **unter 120 mm Hg**  
unterer Wert: **unter 80 mm Hg**  
(vor allem bei Nierenproblemen)

12 - 10,6  
8 - 3,4



## Blutdruckmessung:

Regen Sie die Teilnehmer an, regelmäßig den Blutdruck zu kontrollieren.

Informieren Sie die Teilnehmer anschließend über Möglichkeiten der Blutdruckmessung.

### Folie: Den Blutdruck selbst messen: Welche Geräte gibt es?

Blutdruck okay?! MEDIA 2

#### Den Blutdruck selbst messen: Welche Geräte gibt es?

**Vollautomatische Geräte**

- Manschette am Oberarm (Messung genauer) oder am Handgelenk
- Manschette wird maschinell aufgeblasen
- Blutdruckwerte werden optisch angezeigt



**Halbautomatische Geräte**

- Manschette am Oberarm
- Manschette wird per Hand aufgepumpt
- Blutdruckwerte werden optisch angezeigt (müssen nicht akustisch ermittelt werden)
- preislich günstiger als vollautomatische Geräte

Erkundigen Sie sich bei Ihrem Arzt über Zuschüsse/eine Kostenübernahme durch Ihre Krankenkasse.

12 - 05.16  
B - 3.15

### Folie: Blutdruckmessung: die klassische Methode

Blutdruck okay?! MEDIA 2

#### Blutdruckmessung: die klassische Methode

Vor der Messung: fünf Minuten lang ruhig sitzen



Die Manschette am Oberarm so anlegen, dass Blut ungehindert fließen kann



Hörrohr (Stethoskop) an Arschlagader anlegen, die Manschette aufpumpen



Luft ablassen  
Erstes Klopfen = oberer Wert  
Klopfen gerade noch hörbar = unterer Wert



12 - 05.17  
B - 3.16

## Kurstunde 2: Überblick

|             |                           |              |
|-------------|---------------------------|--------------|
| <b>2.</b>   | <b>Ernährung</b>          | <b>Seite</b> |
| <b>2.1</b>  | <b>Gesunde Ernährung</b>  | <b>18</b>    |
| 2.1.1       | Lebensmittel Pyramide     | 19           |
| 2.1.2       | Gesunde Mischkost         | 19           |
| <b>2.2.</b> | <b>Kohlehydrate</b>       | <b>20</b>    |
| <b>2.3</b>  | <b>BE</b>                 | <b>20</b>    |
| <b>2.4</b>  | <b>Glykämischer Index</b> | <b>21</b>    |



## Kurstunde 2: Materialien

| <b>2. Ernährung</b>           | <b>Folien</b>                                                                                                                                                                                                                                                        |
|-------------------------------|----------------------------------------------------------------------------------------------------------------------------------------------------------------------------------------------------------------------------------------------------------------------|
| <b>2.1 Gesunde Ernährung</b>  | „Gesunde Ernährung auch für Diabetiker“                                                                                                                                                                                                                              |
|                               | „Die Ernährungspyramide“<br>„Gesunde Mischkost“                                                                                                                                                                                                                      |
| <b>2.2 Kohlehydrate</b>       | „Kohlehydrate“                                                                                                                                                                                                                                                       |
| <b>2.3 BE</b>                 | „Schätzeinheiten“                                                                                                                                                                                                                                                    |
| <b>2.4 Glykämischer Index</b> | „Glykämischer Index“                                                                                                                                                                                                                                                 |
|                               | Blutzucker erhöhend?“<br>„Nahrungsmittel mit langsamer Blutzuckerwirkung“<br>„Nahrungsmittel oder gemischte Mahlzeiten mit mittlerer Blutzuckerwirkung“<br>„Nahrungsmittel mit schneller Blutzuckerwirkung“<br>„Nahrungsmittel mit sehr schneller Blutzuckerwirkung“ |

## 2. Ernährung

### 2.1 Gesunde Ernährung

#### Ziele:

- Der Teilnehmer weiß, dass es keinen Unterschied zwischen der Ernährung von Diabetikern und der empfohlenen gesunden Ernährung für Nichtdiabetiker gibt.
- Der Teilnehmer weiß, welche Nährstoffe in den Nahrungsmitteln enthalten sind.
- Der Teilnehmer weiß, wieviel Energie die einzelnen Nährstoffe liefern.

#### Vorgehen:

Erläutern Sie den Teilnehmern, dass es keinen Unterschied zwischen einer gesunden Ernährung von Diabetikern und Nichtdiabetikern gibt.

#### Folie: Gesunde Ernährung auch für Diabetiker

Ernährung 3  

Gesunde Ernährung –  
auch für Diabetiker!

Nährstoffempfehlungen für

| Nicht Diabetiker |               | Diabetiker |
|------------------|---------------|------------|
| 50–60%           | Kohlenhydrate | 50–60%     |
| 10–15%           | Eiweiß        | 10–15%     |
| 30–35%           | Fett          | 30–35%     |



*Lilly*

Erläutern Sie die Ernährungspyramide.

### Folie: Die Ernährungspyramide

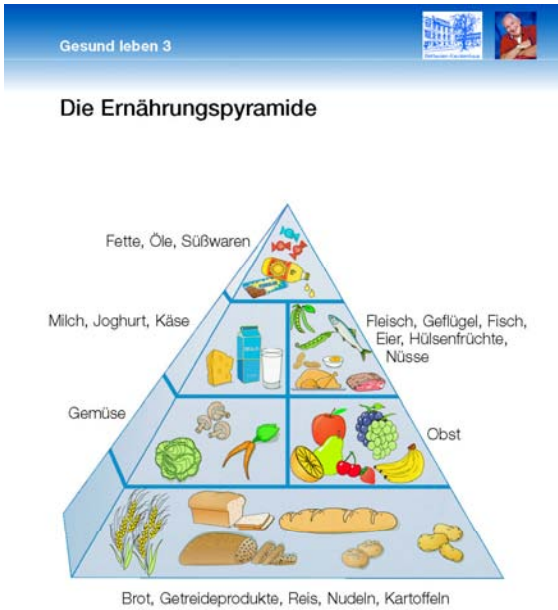

*Lilly*

Erläutern Sie den Teilnehmern wie sich eine gesunde Mischkost zusammensetzt.

### Folie: Gesunde Mischkost

Gesund leben 4

#### Gesunde Mischkost

Täglich:

- Getreideprodukte  
wenn möglich aus Vollkorn
- Kartoffeln/Reis/Nudeln
- frisches Gemüse/Rohkost
- frisches Obst
- Milch/Milchprodukte
- kleine Portion Fleisch/  
Geflügel/Wurst/Käse
- wenig Fett
- mindestens 1,5 l Trinkflüssigkeit  
= 2 Flaschen Wasser

Wöchentlich:

- 1-2 mal Fisch

*Lilly*

## 2.2 Kohlehydrate

### Ziele:

- Der Patient weiß, dass kohlehydrathaltige Nahrungsmittel den Blutzucker erhöhen.

### Vorgehen:

Erläutern Sie den Teilnehmern welche Kohlehydrate es gibt und worin diese enthalten sind.

### Folie: Kohlehydrate

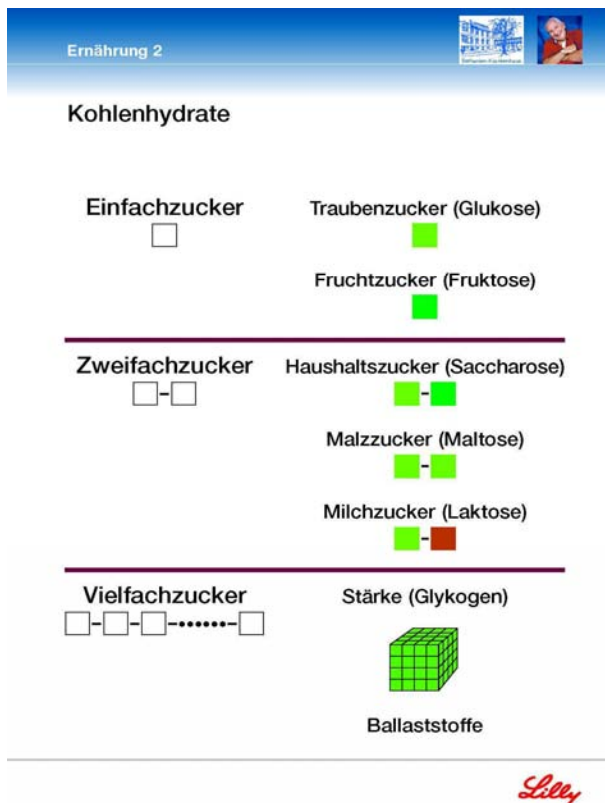

## 2.3 BE

### Ziele:

- Die Teilnehmer wissen, was eine BE ist.
- Die Teilnehmer können Nahrungsmittel aufzählen, die den Blutzucker erhöhen bzw. nicht erhöhen.
- Die Teilnehmer können kohlehydrathaltige Nahrungsmittel mengenmäßig einschätzen (BE).
- Die Teilnehmer kennen Nahrungsmittel mit schneller bzw. langsamer Blutzuckerwirkung.

### Vorgehen:

Wiederholen Sie mit den Teilnehmern die unterschiedlichen Maße, die es gibt um kohlehydrathaltige Nahrungsmittel einzuschätzen.

## Folie: Schätzeinheiten

Ernährung 6

### Schätzeinheiten



10–12 g Blutzucker erhöhende KH entsprechen:

- 1 BE
- 1 KE
- 1 KHE

*Lilly*

## 2.4 Glykämischer Index

### Ziele:

- die Teilnehmer sollen den Glykämischen Index der verschiedenen Nahrungsmittel kennen.

### Vorgehen:

Erläutern Sie den Teilnehmern den Glykämischen Index der Nahrungsmittel und deren Wirkungsweisen auf den Blutzucker.

## Folie: Anstieg des Blutzuckerspiegels

### Anstieg des Blutzuckerspiegels

bei:

1. Traubenzucker  
2. Obstsäften  
3. Weißbrot, Mischbrot  
4. Milch- und Milchprodukten  
5. Vollkornbrot, Vollkornnudeln, Müsli  
6. Möhren, Kohlarten, Hülsenfrüchten  

**LIFESCAN**  
of diabetes for better control

Besprechen Sie mit den Teilnehmern, welche Nahrungsmittel Blutzucker erhöhend wirken.

Folie: Blutzucker erhöhend?

Ernährung 9

### Blutzucker erhöhend ?

**Hülsenfrüchte**

- Linsen
- Erbsen, Kichererbsen
- Bohnen, Sojabohnen

enthalten Ballaststoffe



1 tiefer Teller voll  
ohne Berechnung

**Nüsse, Kerne und Samen**

- Erdnüsse, Haselnüsse
- Walnüsse, Kokosnuss
- Pistazien, Kürbiskerne
- Leinsamen, Mohn
- Mandeln

enthalten Fett, Ballaststoffe



1 handvoll  
ohne Berechnung

**Diätprodukte**

- Diät-Marmelade
- Diät-Sirup
- Diät-Nuss-Nougat-Creme
- Diät-Bonbons
- Diät-Schokolade

enthalten Fruchtzucker oder  
Zuckeraustauschstoffe



*Lilly*

Besprechen Sie mit den Teilnehmern, welche Nahrungsmittel einen langsamen Blutzuckeranstieg bewirken.

Folie: Nahrungsmittel mit langsamer Blutzuckerwirkung

Ernährung 11

### Nahrungsmittel mit langsamer Blutzuckerwirkung

Mit einem **langsamen** Blutzuckeranstieg ist zu rechnen:

- bei **ballaststoffreichen** Mahlzeiten
- und/oder** bei **fettreichen** Mahlzeiten

zum Beispiel:

- Müsli
- Vollkornbrot mit Butter und Räucherfisch
- Sahnetorte, Buttercremetorte
- Kartoffelsalat mit Würstchen
- Pommes frites mit Mayonnaise
- Bauernfrühstück mit Rohkostsalat



*Lilly*

Besprechen Sie mit den Teilnehmern, welche Nahrungsmittel einen mittleren Blutzuckeranstieg bewirken.

### Folie: Nahrungsmittel oder gemischte Mahlzeiten mit mittlerer Blutzuckerwirkung

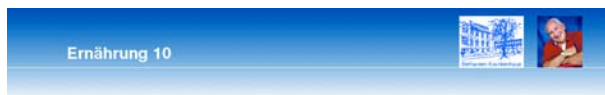

#### Nahrungsmittel oder gemischte Mahlzeiten mit mittlerer Blutzuckerwirkung

Mit einem **mittleren** Blutzuckeranstieg ist zu rechnen:

- bei **kohlenhydrathaltigen** Nahrungsmitteln (auch bei zuckerhaltigen Nahrungsmitteln) in Verbindung mit **Fett** bzw. **Eiweiß und Fett**

zum Beispiel:

- Kartoffeln, Gemüse, Fleisch mit Soße und Nachtisch
- Käsebrot, Wurstbrot
- Schokolade, Schokoriegel
- Eis mit Sahne

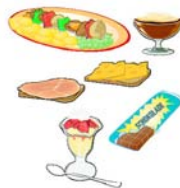

*Lilly*

Besprechen Sie mit den Teilnehmern, welche Nahrungsmittel einen schnellen Blutzuckeranstieg bewirken.

### Folie: Nahrungsmittel mit sehr schneller Blutzuckerwirkung

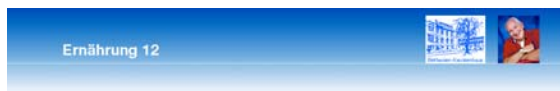

#### Nahrungsmittel mit schneller Blutzuckerwirkung

Mit einem **schnellen** Blutzuckeranstieg ist zu rechnen:

- bei Weißmehlprodukten ohne jegliche Eiweiß- oder Fettzugabe

zum Beispiel:

- Cornflakes
- Toast
- Brötchen
- Zwieback

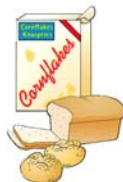

*Lilly*

Besprechen Sie mit den Teilnehmern, welche Nahrungsmittel einen sehr schnellen Blutzuckeranstieg bewirken.

### Folie: Nahrungsmittel mit sehr schneller Blutzuckerwirkung

Ernährung 13  

#### Nahrungsmittel mit sehr schneller Blutzuckerwirkung

Mit einem **sehr schnellen** Blutzuckeranstieg ist zu rechnen:

- bei Zucker in konzentrierter, isolierter Form und
- bei zuckerreichen Getränken

zum Beispiel:

- Traubenzucker
- Zucker
- Honig
- Malzbier
- Colagetränke
- Limonade



→ z.B. bei Unterzuckerung geeignet

*Lilly*



## Kurstunde 3: Überblick

| <b>3.</b> | <b>Grundlagen der Insulintherapie</b> | <b>Seite</b> |
|-----------|---------------------------------------|--------------|
| 3.1.      | Insulinwirkung                        | 27           |
| 3.2       | Dosisanpassung                        | 30           |
| 3.3       | Spritztechnik                         | 33           |

## Kurstunde 3: Materialien

### Folien

#### 3. Grundlagen der Insulintherapie

---

|                      |                                                      |
|----------------------|------------------------------------------------------|
| 3.1 Insulinwirkung   | „Insulinkurven: Kurzwirkendes Analoginsulin“         |
|                      | „Insulinkurven: Verzögerungsinsulin“                 |
|                      | „Insulinkurven: Mischinsulin“                        |
|                      | „Analoginsulin vs. Normalinsulin“                    |
|                      | „Insulinkurven und KH-Aufnahme“                      |
| 3.2 Insulinanpassung | „Basis – Bolus Prinzip“                              |
|                      | „Korrektur des Blutzuckers“                          |
|                      | „BZ-Therapieziel“                                    |
|                      | „Spritz-Ess-Abstand bei Normalinsulin“               |
|                      | „Spritz-Ess-Abstand bei Kurzwirkendem Analoginsulin“ |
| 3.3 Spritztechnik    | „Spritztechnik“                                      |
|                      | „Spritztechnik“                                      |
|                      | „Ungeeignete Körperregionen“                         |

---

**Bitte den Teilnehmern Arbeitsblatt 13 für Kursstunde 5 mit nach Hause geben!**

### 3. Grundlagen Insulintherapie

#### 3.1 Insulinkurven

##### Ziele:

- der Teilnehmer kennt Wirkungseintritt, stärkste Wirkung und Wirkdauer der verschiedenen Insuline.
- der Teilnehmer weiß, dass die Kohlehydratmenge und das Insulin aufeinander abgestimmt werden müssen, um eine gute Blutzuckereinstellung zu haben.
- der Teilnehmer weiß, wodurch sich der Insulinbedarf verändern kann.

##### Vorgehen:

Besprechen Sie mit den Teilnehmern die Wirkung (Wirkungseintritt, stärkste Wirkung und Wirkdauer) der verschiedenen Insuline.

##### Folie: Insulinkurven

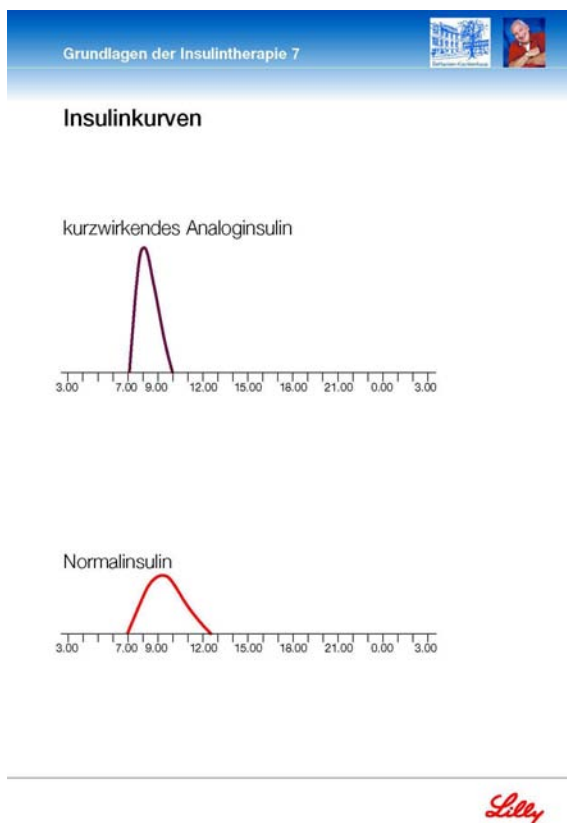

##### Folie: Insulinkurven

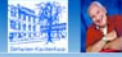

### Insulinkurven

Verzögerungsinsulin (NPH)

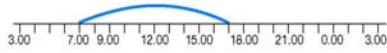

mittellang wirkendes Analoginsulin (Detemir)

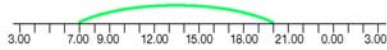

lang wirkendes Analoginsulin (Glargin)

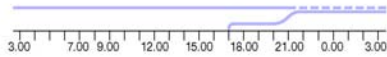

*Lilly*

### Folie: Insulinkurven

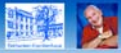

### Insulinkurven

Mischinsulin (mit Normalinsulin)

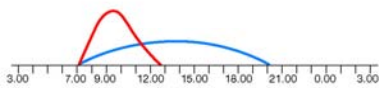

Mischinsulin (mit kurzwirkendem Analoginsulin)

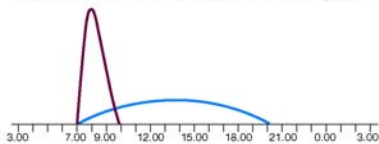

*Lilly*

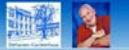

**Kurzwirkendes Analoginsulin wirkt schneller als Normalinsulin**

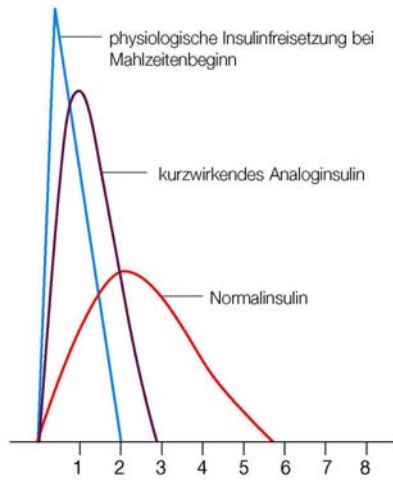

*Lilly*

Besprechen Sie mit den Teilnehmern wie das Insulin auf die Kohlehydratmenge abgestimmt werden muss.

**Folie: Insulinkurven und KH-Aufnahme**

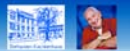

**Insulinkurven und KH-Aufnahme**

Kurzwirkendes Analoginsulin

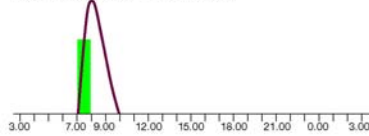

Normalinsulin

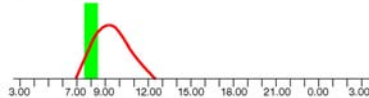

Mischinsulin (mit Normalinsulin) und NPH-Verzögerungsinsulin

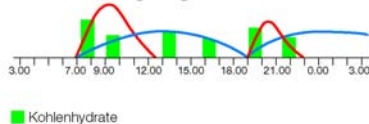

■ Kohlenhydrate

*Lilly*

## 3.2 Dosisanpassung

### Ziele:

- die Teilnehmer wissen, dass das Essens-Insulin und das Insulin für die Blutzucker-Korrektur als Bolus bezeichnet werden.
- die Teilnehmer wissen, dass der Bolus mit einem kurz wirkenden Insulin gespritzt wird
- die Teilnehmer wissen, dass sie bei jedem kurz wirkenden Insulin für Zwischenmahlzeiten extra spritzen können.
- die Teilnehmer wissen, dass sie mit Normalinsulin frühestens 4 Stunden nach dem letzten Bolus ihren Blutzucker korrigieren dürfen.
- die Teilnehmer wissen, dass das Blutzucker-Therapieziel vor den Hauptmahlzeiten individuell verschieden sein kann.
- die Teilnehmer kennen ihren eigenen Zielwert für den Blutzucker.
- die Teilnehmer wissen, dass der Blutzucker vor dem Schlafengehen nicht unter 120 mg/dl liegen sollte
- die Teilnehmer wissen, wann es sinnvoll ist, einen Spritz-Eß-Abstand einzuhalten und wann ein Spritz-Eß-Abstand kontraindiziert ist.
- die Teilnehmer wissen, wie sie ihre BE-Faktoren überprüfen und anpassen können.
- die Teilnehmer wissen, wie sie ihre Korrektur-Regeln überprüfen und verändern können.

### Vorgehen:

Besprechen Sie mit den Teilnehmern das Prinzip der Basis Bolus Therapie.

### Folie: Basis-Bolus Therapie

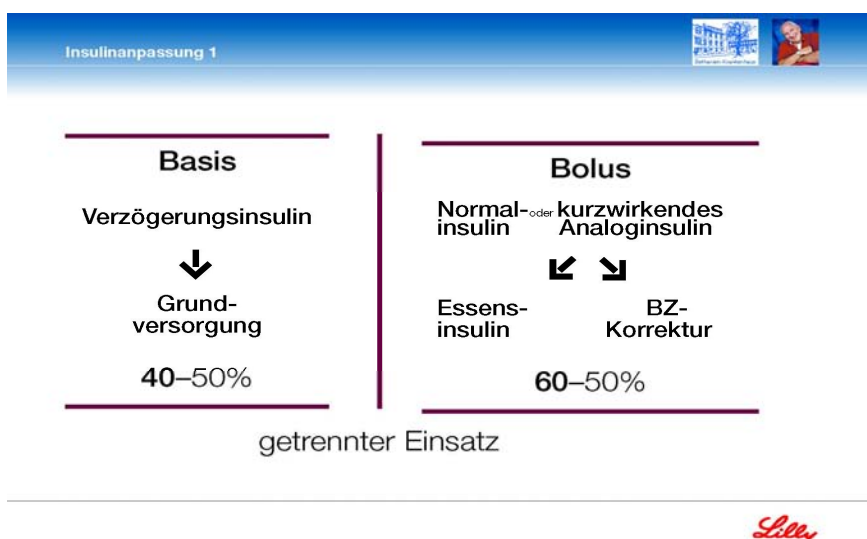

Erläutern Sie welche Korrekturmöglichkeiten die verschiedenen Insuline besitzen.

### Folie: Korrektur des Blutzuckers

Insulinanpassung 4  

**Korrektur des Blutzuckers**

---

mit **Normalinsulin**

→ frühestens **4 Stunden**  
nach dem letzten  
Bolus möglich

---

mit **kurzwirkendem  
Analoginsulin**

→ frühestens **3 Stunden**  
nach dem letzten  
Bolus möglich

*Lilly*

Erläutern Sie den Teilnehmern, dass das Blutzucker-Therapieziel vor den Mahlzeiten individuell verschieden sein kann.

### Folie: BZ-Therapieziel

Insulinanpassung 5  

**Das BZ-Therapieziel vor den Hauptmahlzeiten wird individuell vereinbart:**

- 80 mg/dl (4,4 mmol/l) in der Schwangerschaft
- 100 mg/dl (5,6 mmol/l) im Normalfall
- 120–160 mg/dl (6,7–8,9 mmol/l)
  - bei häufigen Unterzuckerungen und/oder schlechter Unterzuckerungswahrnehmung
  - vorübergehend bei akuten Augenkomplikationen

---

- 120 mg/dl (6 mmol/l) vor dem Schlafengehen (Ausnahme: Schwangerschaft, Pumpentherapie)

*Lilly*

Erläutern Sie den Teilnehmern wichtige Prinzipien zur Einhaltung des Spritz-Ess-Abstandes in Abhängigkeit des Insulintyps

**Folie: Spritz-Ess-Abstand bei Normalinsulin**

Insulinanpassung 6  

### Spritz-Ess-Abstand bei Normalinsulin

| Blutzucker vor dem Essen<br>mg/dl /mmol/l | Empfohlener SEA                                                                          |
|-------------------------------------------|------------------------------------------------------------------------------------------|
| unter 60/3,3                              | 4–6 Scheiben Traubenzucker essen, spritzen und <b>sofort</b> die geplante Mahlzeit essen |
| 60–80/3,3–4,4                             | 2 Scheiben Traubenzucker essen, spritzen und <b>sofort</b> die geplante Mahlzeit essen   |
| Normalbereich um 100/5,6                  | 10–15 Minuten                                                                            |
| über 150/8,3                              | 30 Minuten                                                                               |
| über 200/11,1                             | 45 Minuten                                                                               |
| über 250/13,9                             | 1 Stunde                                                                                 |

Bei höheren Blutzuckerwerten **niemals** länger als 1 Stunde mit dem Essen warten!  
**Unterzuckerungsgefahr!**

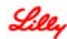

**Folie: Spritz-Essabstand bei kurzwirkendem Analoginsulin**

Insulinanpassung 7  

### Spritz-Ess-Abstand bei kurzwirkendem Analoginsulin

| Blutzucker vor dem Essen<br>mg/dl /mmol/l | Empfohlener SEA                                                                                         |
|-------------------------------------------|---------------------------------------------------------------------------------------------------------|
| unter 60/3,3                              | 4–6 Scheiben Traubenzucker essen, sofort die geplante Mahlzeit essen und <b>nach</b> dem Essen spritzen |
| 60–80/3,3–4,4                             | 2 Scheiben Traubenzucker essen, sofort die geplante Mahlzeit essen und <b>nach</b> dem Essen spritzen   |
| 80–100/4,4–5                              | <b>Nach</b> dem Essen spritzen                                                                          |
| 100–250/<br>5,5–13,9                      | Spritzen und <b>sofort</b> essen                                                                        |
| über 250/13,9                             | 15 Minuten warten                                                                                       |

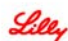



Erläutern Sie an einem Beispiel die Dosisanpassung.

### Folie: Insulinanpassung

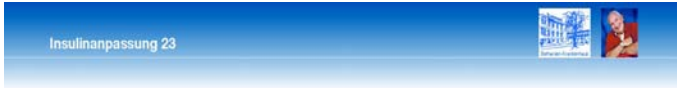

| Datum:             | <input type="checkbox"/> Arbeitstag | <input type="checkbox"/> Urlaubstag | <input type="checkbox"/> Mo | <input type="checkbox"/> Di | <input type="checkbox"/> Mi | <input type="checkbox"/> Do | <input type="checkbox"/> Fr | <input type="checkbox"/> Sa | <input type="checkbox"/> So |                      |
|--------------------|-------------------------------------|-------------------------------------|-----------------------------|-----------------------------|-----------------------------|-----------------------------|-----------------------------|-----------------------------|-----------------------------|----------------------|
| Uhrzeit            |                                     |                                     |                             |                             |                             |                             |                             |                             |                             | Gesamt               |
| BZ                 |                                     |                                     |                             |                             |                             |                             |                             |                             |                             |                      |
| HZ/Ac.             |                                     |                                     |                             |                             |                             |                             |                             |                             |                             |                      |
| BE                 |                                     |                                     |                             |                             |                             |                             |                             |                             |                             |                      |
| BE-Faktor          |                                     |                                     |                             |                             |                             |                             |                             |                             |                             |                      |
| Bolus              |                                     |                                     |                             |                             |                             |                             |                             |                             |                             |                      |
| Basis              |                                     |                                     |                             |                             |                             |                             |                             |                             |                             |                      |
| Blutdruck/<br>Puls |                                     |                                     |                             |                             |                             |                             |                             |                             |                             | Korrektur-<br>Regel: |

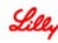

### 3.3 Spritztechnik

#### Ziele:

- Die Teilnehmer wissen, wie sie Veränderungen an den Spritzstellen vorbeugen können.
- Die Teilnehmer wissen, in welche Körperregionen sie injizieren können.

#### Vorgehen:

Wiederholen Sie mit den Teilnehmern die korrekte Spritztechnik und Fehler, die hierbei gemacht werden können.

### Folie: Insulin wird in das Unterhautfettgewebe gespritzt

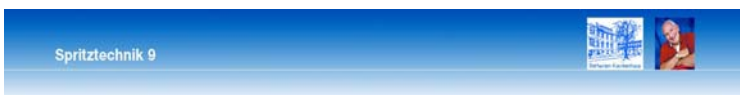

Insulin wird in das Unterhautfettgewebe gespritzt

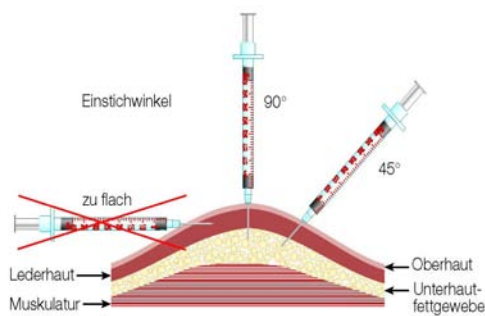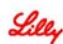

Besprechen Sie mit den Teilnehmern gut geeignete und ungeeignete Körperregionen, in die sie injizieren können.

## Folie: Gut geeignete Körperregionen

Spritztechnik 10  

**Gut geeignete Körperregionen für Insulininjektion:**



**Bauch**  
schnellste Insulin-  
aufnahme (besonders  
oberhalb des  
Bauchnabels)

**Gesäß**  
langsame Insulinaufnahme

**Oberschenkel**  
langsame Insulinaufnahme

**Wechseln Sie die Spritzstellen!**

- Empfehlenswert:  
wechseln der Spritzstellen innerhalb  
einer Körperregion

*Lilly*

## Folie: Ungeeignete Körperregionen

### Ungeeignete Körperregionen für Insulininjektion:

- Verhärtungen, Verdickungen
- blaue Flecke, Leberflecken
- Narben

### Lipohypertrophie

Veränderungen der Haut durch ständiges  
Spritzen in dieselben Stellen  
(„Spritzstellen“ → Lipohypertrophien)

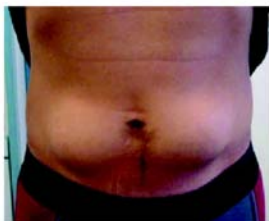

*Lilly*

## Kurstunde 4: Überblick

| <b>4.</b> | <b>Akutkomplikationen: Unterzuckerung</b> | <b>Seite</b> |
|-----------|-------------------------------------------|--------------|
| 4.1.      | Erkennen und Wahrnehmen                   | 37           |
| 4.2.      | Persönliche Problematiken                 | 40           |

## Kurstunde 4: Materialien

### 4. Akutkomplikationen:

### Folien:

#### 4.1 Unterzuckerung

Medias: Anzeichen von Unterzuckerung

Lilly: Unterzuckerung 1

Medias: Ursachen von Unterzuckerung

Medias: Behandlung von Unterzuckerung

Medias: Vermeidung von Unterzuckerung

Lilly: Schwere Unterzuckerung

#### 4.2. Persönliche Problematiken -----

---

### 4. Akutkomplikationen:

#### 4.1 Unterzuckerung

##### Ziele:

- die Teilnehmer erhalten genauere Informationen über Erscheinungsbild und Folgen akuter Blutzuckerentgleisungen.
- die Teilnehmer erwerben Kenntnisse über Behandlungsmaßnahmen bei auftretenden Unterzuckerungen.
- durch die Erarbeitung/Wiederholung von Kenntnissen zu Stoffwechsellentgleisungen sollen die Teilnehmer zusätzlich motiviert werden, regelmäßig Blutzuckerselbstkontrollen durchzuführen.

##### Vorgehen:

Erarbeiten Sie gemeinsam mit den Teilnehmern mögliche Anzeichen einer Unterzuckerung.

Befragen Sie die Teilnehmer nach bisherigen Erfahrungen mit Unterzuckerungen und sammeln Sie Informationen zum erlebten Erscheinungsbild.

**Fassen Sie die gesammelten Symptome anschließend zusammen:**

##### Folie: Anzeichen von Unterzuckerungen

Auf Blutzuckerwerte achten

MEDIA 2

Anzeichen von Unterzuckerungen

|                 |                                         |                               |
|-----------------|-----------------------------------------|-------------------------------|
| Nervosität      | plötzliche<br>Stimmungs-<br>veränderung | nachlassende<br>Konzentration |
| Sprachstörung   |                                         | Blässe                        |
| Schwitzen       |                                         | Schstörungen                  |
| Schwäche        |                                         | Zittern                       |
| Schwindel       |                                         | Herzklopfen                   |
| Heiß-<br>hunger |                                         | unsicherer<br>Gang            |
|                 | innere<br>Unruhe                        | weiche<br>Knie                |

12-12  
8-230

Unterzuckerungen können nur bei Personen auftreten, die insulinfreisetzende Tabletten einnehmen oder Insulin spritzen.

Wiederholen Sie nochmals den Wertebereich von Unterzuckerungen.

## Folie: Hypoglykämie

Unterzuckerung 1

**Hypo glyk mie**

↓ ↓ ↓

zuwenig Zucker im Blut

**Definition**

- Unterzuckerung – BZ < 50 mg/dl  
– BZ < 2,8 mmol/l
- schwere Unterzuckerung – Fremdhilfe ist notwendig  
– Glukagoninjektion z.B. durch Angehörige  
– Glukoseinjektion durch den Arzt

**Ursachen**

- zuviel Insulin gespritzt
- nicht genug Kohlenhydrate oder zu spät gegessen
- starke körperliche Anstrengung
- Alkohol

*Lilly*

Besprechen Sie zusammen mit den Teilnehmern mögliche Ursachen einer Unterzuckerung.

## Folie: Ursachen von Unterzuckerung

Auf Blutzuckerwerte achten

MEDIA 2

**Ursachen von Unterzuckerungen**

Ein Unterzucker kann auftreten, wenn Sie insulin-freisetzende Tabletten eingenommen haben und dann ...

**Ursachen**

- ... zu wenig oder zu spät essen (fehlende Kohlenhydrate)
- ... sich außergewöhnlich stark körperlich belasten
- ... zu viel Alkohol trinken

12-23  
8-231

Informieren Sie anschließend die Teilnehmer über geeignete Behandlungsmaßnahmen bei Unterzuckerungen.

### Folie: Behandlung von Unterzuckerung

Auf Blutzuckerwerte achten MEDIA 2

#### Behandlung von Unterzuckerungen

- Ca. 3-4 Tüfelchen Traubenzucker
- 1 Glas (0,2l) Cola, zuckerhaltige Limonade
- 1 Glas (0,2l) Fruchtsaft, Malzbier (mit Zuckerzusatz)



Bei ersten Anzeichen einer Unterzuckerung: sofort (be)handeln.

Bei Unterzucker keine Diätprodukte essen und trinken.

12 - 24  
8 - 232

Besprechen Sie anschließend mit den Teilnehmern geeignete Möglichkeiten der Vermeidung von Unterzuckerungen.

### Folie: Tipps zur Vermeidung von Unterzuckerung

Auf Blutzuckerwerte achten MEDIA 2

#### Tipps zur Vermeidung von Unterzuckerungen

- **Informieren:**  
Angehörige und Bekannte über Unterzucker und dessen Anzeichen informieren
- **Vorausschauen:**  
bei langer körperlicher Belastung insulinfreisetzende Tabletten reduzieren
- **Kontrollieren:**  
auf Unterzuckerungsanzeichen achten, Blutzucker messen
- **Auf Nummer sicher gehen:**  
nach einer Unterzuckerung zusätzliche Kohlenhydrate (Brot/Kekse) essen
- **Analysieren:**  
nach jeder Unterzuckerung nach möglichen Ursachen suchen



12 - 25  
8 - 232

Besprechen Sie mit den Teilnehmern die Anwendung der Glukagon Injektion

### Folie: Schwere Unterzuckerung

Unterzuckerung 6 

#### Schwere Unterzuckerung



**Achtung:**  
Bei schwerer Unterzuckerung durch Alkohol wirkt Glukagon eventuell nicht

- Glukagon kann von geschulten Angehörigen gespritzt werden, man kann nichts falsch machen!
- Glukagon setzt in der Leber vorhandene Zuckerreserven frei
- Glukagon wirkt innerhalb von 10 Minuten
- anschließend sofort 4 bis 6 Tüfelchen Traubenzucker essen oder 1 bis 2 Gläser Saft bzw. Cola trinken

**Notarzt rufen**

- bei Unsicherheit
- wenn Glukagon nicht wirkt

---



## 4.2. Persönliche Problematiken

Geben Sie den Patienten die Gelegenheit über persönliche Problematiken zu sprechen.

Wenn noch Zeit ist kann an dieser Stelle, auch Hyperglykämie besprochen werden.



## Kurstunde 5: Überblick

| <b>5.</b> | <b>Körperliche Aktivität</b>            | <b>Seite</b> |
|-----------|-----------------------------------------|--------------|
| 5.1       | Motivation zu körperlicher Aktivität    | 43           |
| 5.2       | Dosisanpassung an körperliche Aktivität | 47           |

## Kurstunde 5: Materialien

### 5. Körperliche Aktivität

#### Folien:

#### 5.1 Motivation zu körperlicher Aktivität

- „Wie aktiv sind Sie in Ihrem Alltag?“
- „Vorteile von Bewegung bei Diabetes“
- „Sich wohler fühlen“
- „Tipps zur körperlichen Bewegung“
- „Günstig Ausdauersport“
- „Körperliche Bewegung im Alltag“
- „Anzeichen von Überanstrengung“
- „Daran sollten Sie auch denken“

#### 5.2 Dosisanpassung bei körperlicher Aktivität

- „Körperliche Aktivität und Energiebedarf“
- „Insulinausschüttung bei körperlicher“ Aktivität
- „Konsequenzen für insulinbehandelte Diabetiker“
- „Allgemeine Hinweise“
- „Zusatz-BE“
- „Zusatz-BE oder Insulinreduktion“
- „Anpassung bei Langzeitaktivität“
- „Anpassung bei Langzeitaktivität“

Handgeschriebene Folie: eigenes Beispiel

### 5. Körperliche Bewegung

#### 5.1. Motivation zu körperlicher Bewegung

##### Ziele

- Die Teilnehmer sollen in dieser Einheit verstehen, dass körperliche Bewegung eine wirksame Maßnahme innerhalb der Diabetestherapie darstellt.
- Die Teilnehmer sollen Möglichkeiten finden sich zu körperlicher Bewegung zu motivieren.
- Die Teilnehmer sollen geeignete Sportarten für sich entdecken.
- Die Teilnehmer sollen Möglichkeiten entdecken, im Alltag körperliche Aktivität einfließen zu lassen.

##### Vorgehen

Lassen Sie die Teilnehmer berichten, wie sie körperliche Aktivitäten in ihrem Alltag erleben. Gehen Sie hierzu auf das Arbeitsblatt ein, das sie am ersten Kurstag ausgegeben haben.

##### Folie: Wie aktiv sind Sie in Ihrem Alltag?

The slide features the slogan 'Bewegung tut gut' in red cursive at the top left and the 'MEDIA 2' logo at the top right. The main title 'Wie aktiv sind Sie in Ihrem Alltag?' is in blue. Below the title is a photograph of a person's legs walking on a path. A list of four questions is presented with blue circular bullet points. A vertical blue bar is on the right side of the slide, and a blue halftone pattern is at the bottom right. In the bottom left corner, there is small text: '12 - 714' and '8 - 614'.

**Bewegung tut gut** MEDIA 2

Wie aktiv sind Sie in Ihrem Alltag?

- Bewegen Sie sich in Ihrem Alltag viel? Treiben Sie Sport?
- Haben Sie Freude an Bewegung?
- Was hindert Sie an regelmäßiger körperlicher Aktivität?
- Welche Art von Bewegung, Sport hat Ihnen früher Spaß gemacht?

12 - 714  
8 - 614

##### Besprechen von Arbeitsblatt 13

Erläutern Sie den Teilnehmern die Effekte, die Bewegung auf den Diabetes hat.

**Folie: Vorteile von Bewegung bei Diabetes**

*Bewegung tut gut* MEDIAS 2

### Vorteile von Bewegung bei Diabetes



**Blutzucker**   **Bluthochdruck**   **Gewicht**

↓                      ↓                      ↓

Zelltüren funktionieren besser: Blutzucker sinkt      Blutdruck sinkt      Abnehmen geht leichter

12 - 25  
8 - 65

**Folie: Sich wohler fühlen**

*Bewegung tut gut* MEDIAS 2

### Sich wohler fühlen



**Fitness**

- Mehr Ausdauer
- Mehr Beweglichkeit



**Mehr Lebensfreude**

- Besseres Wohlbefinden
- Mehr „Schwung“
- Ausgleich bei Stress



**Geselligkeit**

- Mit Freunden, Bekannten etwas unternehmen

12 - 26  
8 - 66

Erarbeiten Sie mit den Teilnehmern gemeinsam Möglichkeiten wie sie sich zur körperlichen Bewegung motivieren können.

**Folie: Tipps zur körperlichen Bewegung**

Bewegung tut gut MEDIA 2

Tipps zur körperlichen Bewegung



Gemeinsam geht's leichter,  
Bewegung soll Spaß machen.



Lieber wenig,  
dafür regelmäßig ...



... als viel  
und selten.

12-27  
8-67

Vermitteln Sie welche Sportarten günstig sind.

**Folie: Günstige Ausdauersportarten**

Bewegung tut gut MEDIA 2

Günstig: Ausdauersportarten



Schwimmen



Rad fahren



Wandern



Gymnastik

12-28  
8-68

Überlegen Sie gemeinsam mit den Teilnehmern, wo sie im Alltag körperliche Bewegung einfließen lassen können.

**Folie: Körperliche Bewegung im Alltag**

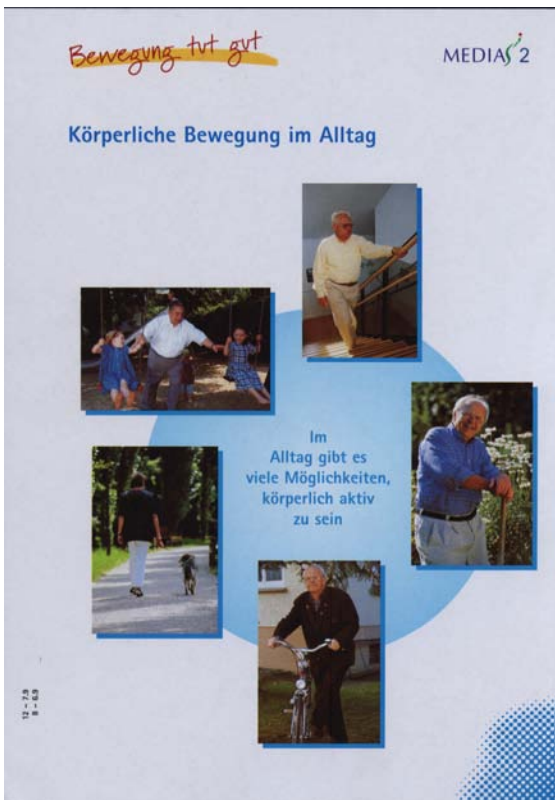

Erläutern Sie den Teilnehmern, die Anzeichen einer Überanstrengung.

**Folie: Anzeichen von Überanstrengung**

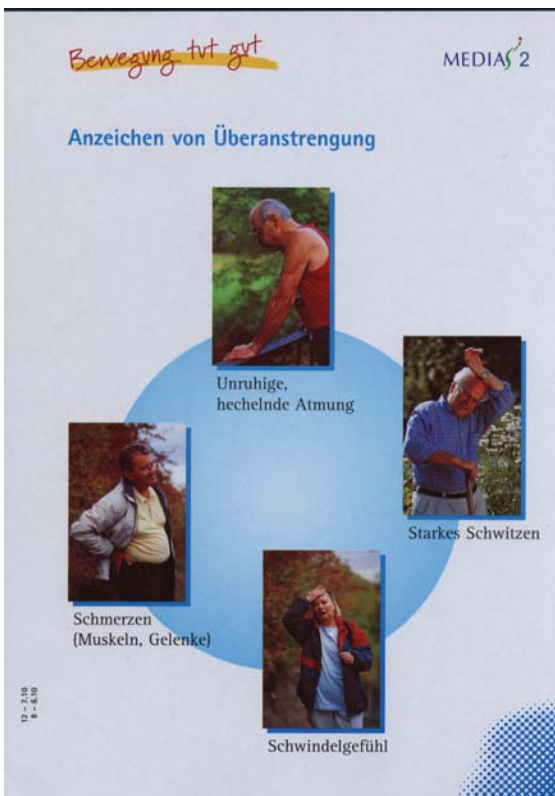

**Besprechen Sie weitere wichtige Punkte bei körperlicher Bewegung.**

**Folie: Daran sollten Sie auch denken**

## 5.2. Dosisanpassung bei körperlicher Aktivität

**Ziele:**

- die Teilnehmer wissen, wie der Körper seinen höheren Kohlehydratbedarf bei Bewegung deckt.
- die Teilnehmer wissen, dass der Insulinbedarf bei körperlicher Bewegung sinkt.
- die Teilnehmer wissen, dass sie Unterzuckerungen durch Kohlehydrat-Zufuhr und/oder Insulinreduktion vorbeugen können.
- die Teilnehmer wissen, wann sie auf Sport verzichten sollten.
- die Teilnehmer kennen spät einsetzende Unterzuckerungen als Nachwirkung von Sport.
- die Teilnehmer kennen die Faustregel für Insulinreduktion bzw. KH-Zufuhr bei Kurz- und Langzeitbelastung.
- die Teilnehmer wissen, dass sie die Regeln für sich individuell anpassen müssen.
- die Teilnehmer kennen die Risiken der gewählten Sportart im Hinblick auf dessen Unterzuckerungsrisiko und der gesundheitliche Situation.

**Vorgehen:**

Erläutern Sie den Teilnehmern, wie der Körper seinen höheren Kohlehydratbedarf bei Bewegung abdeckt.

**Folie: bei körperlicher Aktivität steigt der Energiebedarf**

Bewegung/Sport 1 

**Bei körperlicher Aktivität steigt der Energiebedarf**

- Die Muskeln benötigen mehr Energie
- Die Energie kommt
  - aus den **Muskeln**
    - Freisetzung von Traubenzucker aus den Glykogenspeichern
  - aus der **Leber**
    - Freisetzung von Traubenzucker aus dem Glykogenspeicher
    - Neubildung von Traubenzucker aus anderen Stoffen
  - aus den **Fettdepots**
    - Verbrennung von Fettsäuren
  - aus der **Nahrung**

*Lilly*



Erläutern Sie wieso der Organismus bei körperlicher Aktivität weniger Insulin benötigt.

Folie: Insulinausschüttung bei körperlicher Aktivität

Bewegung/Sport 2

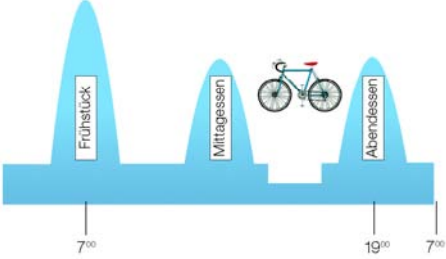

Insulinausschüttung bei körperlicher Aktivität (Nichtdiabetiker)

- Der Insulinspiegel sinkt bei körperlicher Aktivität ab. Dadurch wird der Zuckernachschub aus der Leber möglich. Aber: etwas Insulin muss vorhanden sein!
- Der Traubenzuckertransport in die Zellen ist erleichtert.
- Der Blutzucker bleibt normal.
- Nach der Aktivität werden die Speicher in Muskeln und Leber wieder aufgefüllt.

*Lilly*

Erläutern Sie den Teilnehmern die Konsequenzen körperlicher Bewegung in Bezug auf ihren Insulinbedarf.

Folie: Konsequenzen für insulinbehandelte Diabetiker

Bewegung/Sport 3

Konsequenzen für insulinbehandelte Diabetiker

- Muskelarbeit verstärkt die Insulinwirkung!

**Achtung! Unterzuckerungsgefahr!**

- Deshalb Insulin vermindern und/oder kohlenhydrathaltige Nahrungsmittel essen.

**Aber:** Etwas Insulin wird immer benötigt. Sonst kommt es zum Blutzuckeranstieg mit Ketoazidosegefahr.

*Lilly*



**Besprechen Sie mit den Teilnehmern worauf sie bei körperlicher Aktivität achten sollten.**

**Folie: Allgemeine Hinweise**

Bewegung/Sport 4

**Allgemeine Hinweise**

- Vor der Aktivität überlegen
  - Art, Dauer und Stärke der Anstrengung?
  - Trainingszustand?
  - Insulinwirkung?
  - Letzte Mahlzeit?
  - Aktueller Blutzucker? Azetontest?
- Blutzucker messen:  
vor – während – nach der Aktivität!

**Achtung: Unterzuckerungsgefahr!**

– Auch Stunden nach der Bewegung kann der Zuckerbedarf noch erhöht sein. Die Zuckerspeicher in Muskeln und Leber werden aus dem Blut aufgefüllt. Der Auffülleffekt kann über 24 Stunden dauern.

*Lilly*

**Besprechen Sie mit den Teilnehmern wie sie ihre Kohlehydratzufuhr auf die körperliche Aktivität anpassen können.**

**Folie: Zusatz-BE**

Bewegung/Sport 6. A.

**Zusatz-BE**

Faustregel:

**Pro 30 Minuten Aktivität mittlerer Intensität 1 Zusatz-BE essen**

Geeignete Zusatz-BE

- „langsame“ BE
  
- „schnelle“ BE

*Lilly*

## Folie: Zusatz-BE oder Insulinreduktion

| Bewegung/Sport 8                         |                                                                                                                                                                                                                                                                                                                                                                      |                   |                   |          |          |             |             |                                  |  |                                          |  |
|------------------------------------------|----------------------------------------------------------------------------------------------------------------------------------------------------------------------------------------------------------------------------------------------------------------------------------------------------------------------------------------------------------------------|-------------------|-------------------|----------|----------|-------------|-------------|----------------------------------|--|------------------------------------------|--|
| Maßnahme                                 | Normalinsulin   Kurzwirkendes Insulinanalogon                                                                                                                                                                                                                                                                                                                        |                   |                   |          |          |             |             |                                  |  |                                          |  |
| <b>Aktivitätsbeginn</b>                  |                                                                                                                                                                                                                                                                                                                                                                      |                   |                   |          |          |             |             |                                  |  |                                          |  |
| 50% Reduktion des Bolus                  | <table border="0"> <tr> <td>bis zu 3 Stunden</td> <td>bis zu 2 Stunden</td> </tr> <tr> <td>nach dem</td> <td>nach dem</td> </tr> <tr> <td>Essensbolus</td> <td>Essensbolus</td> </tr> <tr> <td colspan="2" style="text-align: center;">vor Sport BZ testen (Zusatz BE?)</td> </tr> <tr> <td colspan="2">VI-Wirkung mitbedenken (Lücke? Maximum?)</td> </tr> </table> | bis zu 3 Stunden  | bis zu 2 Stunden  | nach dem | nach dem | Essensbolus | Essensbolus | vor Sport BZ testen (Zusatz BE?) |  | VI-Wirkung mitbedenken (Lücke? Maximum?) |  |
| bis zu 3 Stunden                         | bis zu 2 Stunden                                                                                                                                                                                                                                                                                                                                                     |                   |                   |          |          |             |             |                                  |  |                                          |  |
| nach dem                                 | nach dem                                                                                                                                                                                                                                                                                                                                                             |                   |                   |          |          |             |             |                                  |  |                                          |  |
| Essensbolus                              | Essensbolus                                                                                                                                                                                                                                                                                                                                                          |                   |                   |          |          |             |             |                                  |  |                                          |  |
| vor Sport BZ testen (Zusatz BE?)         |                                                                                                                                                                                                                                                                                                                                                                      |                   |                   |          |          |             |             |                                  |  |                                          |  |
| VI-Wirkung mitbedenken (Lücke? Maximum?) |                                                                                                                                                                                                                                                                                                                                                                      |                   |                   |          |          |             |             |                                  |  |                                          |  |
| <b>Aktivitätsbeginn</b>                  |                                                                                                                                                                                                                                                                                                                                                                      |                   |                   |          |          |             |             |                                  |  |                                          |  |
| Zusatz-BE                                | <table border="0"> <tr> <td>später als 3 Std.</td> <td>später als 2 Std.</td> </tr> <tr> <td>nach dem</td> <td>nach dem</td> </tr> <tr> <td>Essensbolus</td> <td>Essensbolus</td> </tr> <tr> <td colspan="2" style="text-align: center;">vor Sport BZ testen</td> </tr> <tr> <td colspan="2">VI-Wirkung mitbedenken (Lücke? Maximum?)</td> </tr> </table>            | später als 3 Std. | später als 2 Std. | nach dem | nach dem | Essensbolus | Essensbolus | vor Sport BZ testen              |  | VI-Wirkung mitbedenken (Lücke? Maximum?) |  |
| später als 3 Std.                        | später als 2 Std.                                                                                                                                                                                                                                                                                                                                                    |                   |                   |          |          |             |             |                                  |  |                                          |  |
| nach dem                                 | nach dem                                                                                                                                                                                                                                                                                                                                                             |                   |                   |          |          |             |             |                                  |  |                                          |  |
| Essensbolus                              | Essensbolus                                                                                                                                                                                                                                                                                                                                                          |                   |                   |          |          |             |             |                                  |  |                                          |  |
| vor Sport BZ testen                      |                                                                                                                                                                                                                                                                                                                                                                      |                   |                   |          |          |             |             |                                  |  |                                          |  |
| VI-Wirkung mitbedenken (Lücke? Maximum?) |                                                                                                                                                                                                                                                                                                                                                                      |                   |                   |          |          |             |             |                                  |  |                                          |  |
| <b>Achtung:</b>                          |                                                                                                                                                                                                                                                                                                                                                                      |                   |                   |          |          |             |             |                                  |  |                                          |  |
| Normalinsulin ist evtl. noch wirksam     | kurzwirkendes Insulinanalogon ist meist nicht mehr wirksam                                                                                                                                                                                                                                                                                                           |                   |                   |          |          |             |             |                                  |  |                                          |  |

*Lilly*

## Folie: Anpassung bei Langzeitaktivität

| Bewegung/Sport 10                                                                                                                                                                                                                                                                                                                                                                                                                                                                      |                                                                                     |
|----------------------------------------------------------------------------------------------------------------------------------------------------------------------------------------------------------------------------------------------------------------------------------------------------------------------------------------------------------------------------------------------------------------------------------------------------------------------------------------|-------------------------------------------------------------------------------------|
| <b>Anpassung bei Langzeitaktivität</b>                                                                                                                                                                                                                                                                                                                                                                                                                                                 |                                                                                     |
| <ul style="list-style-type: none"> <li>● <b>Tagesaktivität</b><br/>(z.B. Fahrradtour, Wandern, Renovieren, Umzug)</li> </ul>                                                                                                                                                                                                                                                                                                                                                           |  |
| <ul style="list-style-type: none"> <li>– mehr Kohlenhydrate essen</li> <li>– Bolusinsulin zu den Mahlzeiten drastisch reduzieren (50%)</li> <li>– tagsüber und abends 30–50% weniger Verzögerungsinsulin</li> <li>– <b>Wichtig:</b> Blutzuckerkontrolle vor dem Schlafengehen. Zusatz-BE erforderlich?</li> <li>– evtl. 3.00 Uhr Blutzuckerkontrolle</li> <li>– vorsichtige Insulindosierung am nächsten Tag (Nachwirkung kann über 24 Stunden dauern! Muskelauffülleffekt)</li> </ul> |                                                                                     |

*Lilly*

## Folie: Anpassung bei Langzeitaktivität

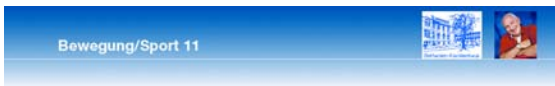

### Anpassung bei Langzeitaktivität

- **Aktivität über mehrere Tage**  
(z.B. Ski- oder Wanderreise, Renovierung)
- Insulinreduktion und gesteigerte KH-Zufuhr beibehalten (siehe Tagesaktivität)
- **Achtung:** Insulinbedarf kann weiter sinken!
- Sportnachwirkung beachten, wenn die Belastung beendet ist (Reduktion zunächst beibehalten, bei ansteigenden BZ-Werten Insulin langsam wieder erhöhen.)

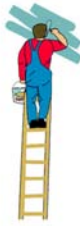

*Lilly*

Erarbeiten Sie mit den Teilnehmern anhand eines Beispiels die Dosisanpassung. Verwenden Sie hierzu eine **Leerfolie** und lassen Sie die Teilnehmer Vorschläge machen.

**Wenn noch Zeit ist oder bei Bedarf noch folgende beide Folien:**

### Folie: Blutzuckeranstieg nach Sport? Was tun?

bei Bedarf zusätzlich:

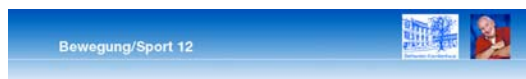

#### Blutzuckeranstieg nach Sport? Was tun?

- Nicht vorschnell den Blutzucker korrigieren. Den Blutzuckerlauf beobachten, 1–2 Stunden nach Sport erneut testen.
- Sollte der BZ nicht abgesunken sein: Vorsichtige BZ-Korrektur nur dann, wenn die Wirkdauer des letzten Bolus vorbei ist.
- Besondere Vorsicht nach Sport am Abend sowie nach Ganztagsaktivitäten! Es ist sicherer, erhöhte Werte vor dem Schlafengehen nicht zu korrigieren (Muskelauffüll-effekt!).

#### **Ausnahme:**

Bei Werten über 240 mg/dl (13,3 mmol/l) nach Sport Azeton testen. Bei Azeton ++/+++ **sofort** mit kurzwirkendem Insulin korrigieren.

*Lilly*

## Folie: Ursachen für Blutzuckeranstieg nach Sport?

Bewegung/Sport 13

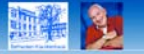

### Ursachen für Blutzuckeranstieg nach Sport

- Zuviel Insulin reduziert?  
Zuviel Zusatz-BE gegessen?  
(häufigste Ursache)

**Abhilfe:**

Tagebuch führen: Einmal ist keinmal!  
Bei wiederholtem Auftreten andere  
Anpassung ausprobieren

- Sport in einer Insulinversorgungslücke  
getrieben?  
(Insulinmangel, Ketoazidosegefahr)

**Abhilfe:**

Insulinversorgungslücke schließen.

---

*Lilly*

## Kurstunde 6: Überblick

|      | <b>Folgeerkrankungen</b>             | <b>Seite</b> |
|------|--------------------------------------|--------------|
| 6.1  | Risikofaktoren für Folgeerkrankungen | 55           |
| 6.2  | Rethinopathie                        | 58           |
| 6.3. | Füße                                 | 59           |
| 6.4  | Kontrolle                            | 63           |

## Kurstunde 6: Materialien

| <b>Folgeerkrankungen</b>                              | <b>Folien:</b>                                                                                                                                                                                                                                               |
|-------------------------------------------------------|--------------------------------------------------------------------------------------------------------------------------------------------------------------------------------------------------------------------------------------------------------------|
| <b>6.1 Risikofaktoren für Folgeerkrankungen</b>       | „Wie denken Sie darüber?“<br>„Folgeerkrankungen betreffen den ganzen Körper“<br>„Was gefährdet die Blutgefäße?“<br>„Umgang mit Folgeerkrankungen“                                                                                                            |
| <b>6.2 Rethinopathie</b>                              | „Augen“                                                                                                                                                                                                                                                      |
| <b>6.3 Füße</b>                                       | „Unsere Füße“<br>„Warum sind Füße bei Diabetes gefährdet?“<br>„Anzeichen von Nervenstörungen“<br>„Anzeichen von Durchblutungsstörungen“<br>„Ein guter Schuh von außen betrachtet“<br>„Ein guter Schuh von innen befühlt“<br>„Die Füße täglich kontrollieren“ |
| <b>6.4 Kontrollintervalle</b>                         | „Diabetes-Check-Up“                                                                                                                                                                                                                                          |
| <b>6.5 Feedback</b>                                   |                                                                                                                                                                                                                                                              |
| <b>Arbeitsblätter 16 und 17 mit nach Hause geben.</b> |                                                                                                                                                                                                                                                              |

### 6. Folgeerkrankungen des Diabetes

#### 6.1. Risikofaktoren für Folgeerkrankungen bei Diabetes

Die Teilnehmer beschäftigen sich mit wichtigen Risikofaktoren (Blutdruck, Störungen des Fettstoffwechsels, Rauchen), die für das Entstehen von Folgekomplikationen verantwortlich sind.

Ausdrücke wie „Folgeerkrankungen des Diabetes“ wie auch „Risikofaktoren“ stellen für die Betroffenen häufig eher abstrakte Begriffe dar. Ermöglichen Sie den Teilnehmern einen persönlichen Bezug: lassen Sie die Teilnehmer ihr persönliches Risikoprofil einschätzen.

#### Ziele

- Die Teilnehmer sollen verstehen, wie Folge- und Begleiterkrankungen des Diabetes zustande kommen.
- Die Inhalte sollen so dargestellt werden, dass die Teilnehmer einen persönlichen Bezug dazu herstellen: es geht nicht um das Risiko für Folgeerkrankungen im Allgemeinen, sondern um das individuelle Risiko eines Teilnehmers.
- Die Auseinandersetzung mit den möglichen Folgen dauerhaft erhöhter Blutzuckerwerte soll die Teilnehmer motivieren, sich möglichst gut um die Behandlung des Diabetes zu bemühen.
- Die wichtigste Botschaft dieser Einheit sollte daher lauten: „Der Diabetes kann sehr unangenehme Folgen für die Gesundheit mit sich bringen, aber diese sind durch eigenes Verhalten beeinflussbar bzw. zu verhindern.“

#### Vorgehen

**Fragen Sie die Teilnehmer wie sie über Folgeerkrankungen denken.**

Folie: Folgeerkrankungen des Diabetes: Wie denken Sie darüber?

*Folgeerkrankungen vermeiden* MEDIA 2

Folgeerkrankungen des Diabetes:  
Wie denken Sie darüber?

**Wo ordnen Sie sich ein?**

„Bisher ging alles gut. Mir wird schon nichts passieren.“

„Angst vor Folgeerkrankungen? Keine Spur.“

„Ich denke nicht an Folgeerkrankungen.“



**Sorglos**

**Sehr besorgt**



„Das Risiko für Folgeerkrankungen ist immens hoch.“

„Ich habe starke Angst vor Folgeerkrankungen.“

„Gedanken an Folgeerkrankungen belasten mich stark.“

11 - 1019  
1 - 43

Erläutern Sie die wesentlichen Risikofaktoren für die Entstehung von Folge- und Begleiterkrankungen.

Folie: Folgeerkrankungen des Diabetes betreffen den ganzen Körper

*Diabetes: gut behandeln* MEDIA 2

Folgeerkrankungen des Diabetes betreffen den ganzen Körper



Gehirn

Herz

Magen Darm

Geschlechtsorgane

Füße

Nerven

Niere

Augen



12 - 28  
8 - 28



Gehen Sie nochmals auf die Konsequenzen eines Blutzuckerstaus vor den Zellen ein, wodurch sich Probleme an den Blutbahnen ergeben können. Durch Verengungen und Ablagerungen an den Blutgefäßen können verschiedene Organe in Mitleidenschaft gezogen werden. Solche Durchblutungsstörungen können sowohl an großen Blutgefäßen als auch an den kleinen Blutgefäßen auftreten.

Weisen Sie aber auch auf Schädigungen der Nerven hin, welche die Funktionsbeeinträchtigungen oder – Ausfall innervierter Organe zur Folge haben kann.

**Folie: Was gefährdet Ihre Blutgefäße?**

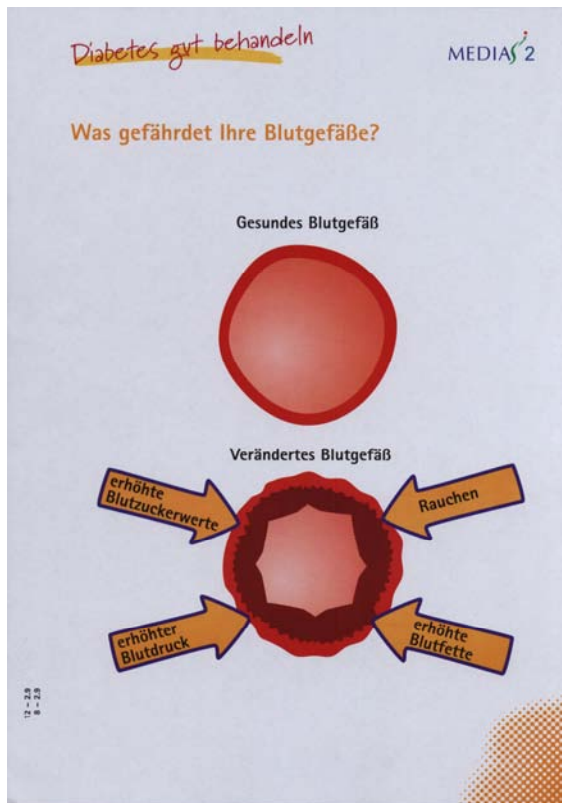

## Folie: Umgang mit Folgeerkrankungen

*Folgeerkrankungen vermeiden* MEDIA 2

### Umgang mit Folgeerkrankungen



**Es lohnt sich**  
Erste Anzeichen von Folgeerkrankungen sind oft nicht spürbar

**Daher** → regelmäßige Kontrolluntersuchungen

**Denn** → frühzeitige Therapie ist am wirkungsvollsten

**Nicht resignieren**  
Auch bei Fortschreiten von Folgeerkrankungen

- können Sie selbst noch viel dagegen tun
- gibt es wirksame Behandlungsmethoden

12-10-20  
8-1-04

## 6.2 Rethinopathie

### Ziel:

- Ziel ist es, den Teilnehmern ein Verständnis zur Ursache und Erkennung der Rethinopathie zu vermitteln.
- Die Teilnehmer sollen wissen welche Behandlungsmöglichkeiten es gibt.

### Vorgehen:

Erläutern Sie den Teilnehmern, dass die Rethinopathie eine häufige Folgeerkrankung des Diabetes ist, wie sie sie erkennen und behandeln können.

## Folie: Folgeerkrankungen vermeiden: Augen

## 6.3 Füße

### Ziele:

- Ziel dieser Einheit ist, dass die Teilnehmer ein Verständnis zur Entstehung und Vorbeugung von diabetischen Fußproblemen gewinnen.
- Die Teilnehmer lernen, ihre Schuhe und Strümpfe im Hinblick auf ihre Eignung zur Vermeidung von Fußproblemen anhand einfacher und verständlicher Kriterien zu beurteilen.
- Die Teilnehmer beschäftigen sich mit Auslösern von Fußkomplikationen, die zunächst kaum wahr- und ernst genommen werden, später jedoch zu schwerwiegenden Problemen führen können.
- Die Teilnehmer sollen in der Lage sein, regelmäßig und strukturiert ihre Füße zu kontrollieren

### Vorgehen:

Fordern Sie die Teilnehmer auf, zu erzählen was deren Füße tagsüber leisten. Lassen Sie die Teilnehmer die Diskrepanz erkennen zwischen der Wichtigkeit der Füße und dem geringen Ausmaß an Aufmerksamkeit, die ihnen häufig entgegengebracht wird.

### Folie: Warum sind die Füße bei Diabetes gefährdet?

**Erarbeiten Sie mit den Teilnehmern die Gründe dafür, dass unscheinbare Druckstellen und Verletzungen am Fuß bei Menschen mit Diabetes ein großes Problem verursachen können.**

Erläutern Sie die Gründe für das erhöhte Risiko:

- schlechtere Durchblutung
- Verletzung oder Druckstellen tun nicht weh
- Wunden heilen schlechter

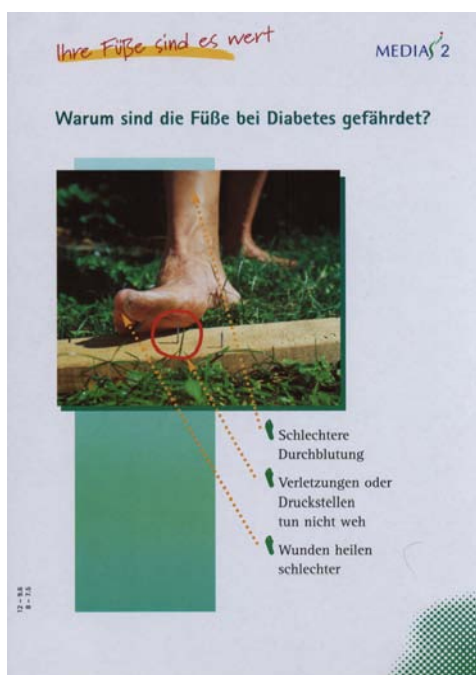

Beschreiben Sie, dass langfristig erhöhte Blutzuckerwerte Nerven und Gefäße schädigen und benennen Sie die entsprechenden Erkrankungen:

- Diabetesbedingte Nervenstörung (Neuropathie)
- Durchblutungsstörungen an den Beinen (arterielle Verschlusskrankheit)

Informieren Sie die Teilnehmer darüber:

- woran sie selbst diese Erkrankungen erkennen können
- wie der Arzt sie feststellen kann

Beschreiben Sie anhand praktischer Beispiele, dass bei einer Neuropathie Schmerzen nicht mehr wahrgenommen werden:

- eingeschränktes Temperaturempfinden
- Kribbeln, Ruheschmerz, Taubheitsgefühl
- Verluste des Schwitzens, rissige Haut

#### Folie Medias: Anzeichen von Nervenstörungen

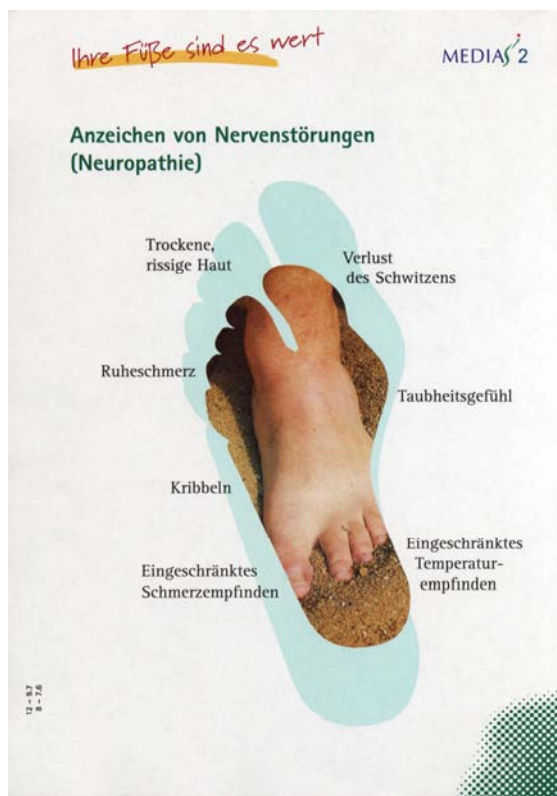

Erläutern Sie die Anzeichen von Durchblutungsstörungen an den Beinen, welche die Teilnehmer selbst registrieren können:

- Wadenkrämpfe und Schmerzen nach kurzen Gehstrecken; Linderung durch Stehen bleiben
- Blasse, dünne Haut
- Schwere, kraftlose Beine

Beschreiben Sie die möglichen Folgen von Durchblutungsstörungen an den Beinen.

Erläutern Sie, dass infolge von Durchblutungsstörungen die Nerven an den Beinen nicht mehr ausreichend mit Blut versorgt werden können – Wunden heilen somit schlechter ab. Bleibt eine rasche Behandlung aus, stirbt das Gewebe um die Wunde herum ab.

Zeigen Sie den Teilnehmern auf, dass Nerven- oder Durchblutungsstörungen sowohl einzeln, als auch gemeinsam auftreten können.

Wichtig ist, sich vor Augen zu führen, dass nicht der Diabetes Fußprobleme verursacht, sondern der unangemessene Umgang mit den Füßen! Wenn sich die Teilnehmer richtig um ihre Füße kümmern, sind Fußprobleme vermeidbar.

### Folie Medias: Anzeichen von Durchblutungsstörungen an den Beinen

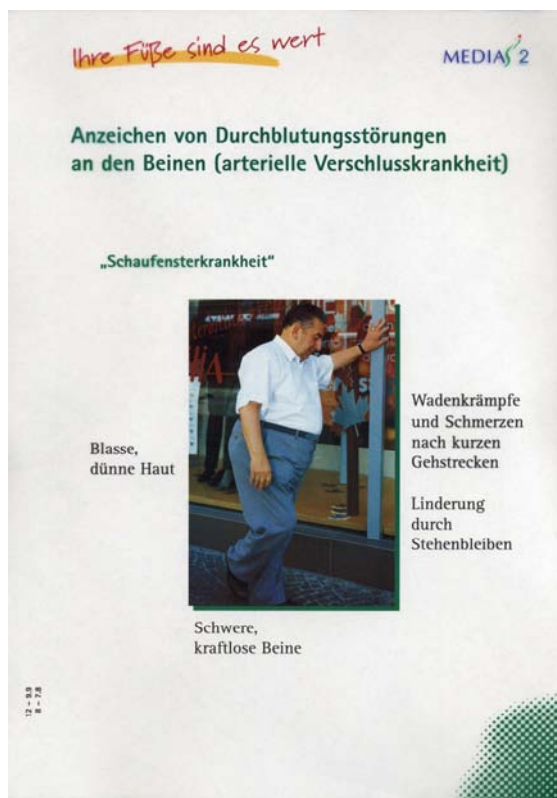

Begründen Sie den Teilnehmern, dass sich diabetische Fußprobleme zum Großteil vermeiden lassen, wenn Menschen mit Diabetes die geeigneten Schuhe und Strümpfe tragen. Regelmäßiges Kontrollieren der Füße macht es möglich, erste Anzeichen eines Fußproblems frühzeitig zu erkennen und rechtzeitig zu reagieren.

Informieren Sie die Teilnehmer über Merkmale geeigneter Schuhe. Begründen Sie jeweils gemeinsam mit den Teilnehmern warum die Beachtung dieser Merkmale sinnvoll ist.

**Erläutern Sie anhand der Folie 12-9.13: Ein guter Schuh – von außen betrachtet**

Ein guter Schuh:

- gibt der Ferse festen Halt
- hat keinen hohen Absatz
- lässt sich nicht leicht verdrehen
- hat weiches Obermaterial
- hat keine zu biegsame Schuhsohle
- hat keine Vorderkappe
- hat ausreichend Platz auch für die Zehen

Richten Sie nun mit den Teilnehmern das Augenmerk aufs Innere der Schuhe und stellen Sie Merkmale eines geeigneten Schuhs hervor. Begründen Sie auch hier, warum die Beachtung dieser Merkmale sinnvoll ist.

Ein guter Schuh:

- hat keine dicken Nähte oder Ösen
- hat keine hohen Absätze
- hat keine harten Stellen und Übergänge
- hat kein vorgefertigtes Fußbett
- hat kein zerrissenes Innenfutter

**Folie Medias 12-9.15: Ein guter Schuh – von innen befühlt**

Rufen Sie in Erinnerung, dass Personen mit Nervenstörungen Druckstellen und kleinere Verletzungen nicht richtig spüren können. Daher müssen die Augen und Hände die Aufgaben der Nerven übernehmen und Veränderungen an den Füßen registrieren.

Erläutern Sie im Einzelnen, worauf die Teilnehmer bei der Fußkontrolle achten sollen:

Folie: Die Füße täglich kontrollieren

*Ihre Füße sind es wert* MEDIAS 2

**Die Füße täglich kontrollieren:  
ansehen und betasten**

- Geschwollene Füße?
- Druckstellen?
- Anzeichen einer Entzündung?  
(Rötung, Schwellung, Eiter)
- Hornhautschwielen, Blasen,  
Hühneraugen oder Verletzungen?
- Rissige, trockene Haut?
- Haut zwischen den Zehen intakt?
- Eingewachsene Nägel?

**Tipp**  
Spiegel verwenden oder andere  
Personen den Fuß betrachten lassen,  
wenn Sie Ihre Fußsohle nicht mehr  
sehen können

12-838  
8-717

The infographic includes two photographs: one showing a person's feet being examined on a table, and another showing a person using a mirror to inspect their foot.

## 6.4 Kontrolluntersuchungen

### Ziele

- Die Teilnehmer sollen erkennen, warum regelmäßige Kontrolluntersuchungen wichtig und notwendig sind: beginnende Veränderungen im Körper aufgrund von Diabetes sind nicht fühl- und spürbar und müssen deshalb regelmäßig kontrolliert werden.
- Auch können die Teilnehmer Risikofaktoren wie erhöhte Blutdruck- oder Blutfettwerte nicht wahrnehmen. Sie sind nur durch Kontrolluntersuchungen zu registrieren. Regelmäßige Kontrolluntersuchungen erlauben es, gezielt vorliegende Risikofaktoren und / oder Folgeerkrankungen zu behandeln.
- Die Einheit dient dazu, die Teilnehmer genauer über die Zielsetzung und den Gebrauch des Gesundheitspasses Diabetes zu informieren.

### Vorgehen

Im Gesundheitspass Diabetes werden die Ergebnisse von regelmäßigen Kontrolluntersuchungen dokumentiert. Sie erläutern die wesentlichen Funktionen des Passes.

Anschließend erläutern Sie, welche Kontrolluntersuchungen wann und wie oft durchgeführt werden sollten.

## **Folie: Mein persönlicher Diabetes-Check-up**

**Geben Sie den Teilnehmern die Arbeitsblätter 16 und 17 mit nach Hause.**

### **6.5 Feedback**

Geben Sie den Kursteilnehmern die Möglichkeit noch Fragen zu stellen und eine Rückmeldung über den Kurs zu geben.

Verabschiedung.
